# Supplementary material
Source: ML conference proceedings conference paper supplement (https://openreview.net/forum?id=jADagw65fi)
Supplement: supplementary_material [file PuzzleScript_jax.pdf › PuzzleScript_jax.pdf]

## A Use of publicly available code and data

*PuzzleJAX* is based on the *PuzzleScript* game engine and Domain-Specific Language, and we further include copies of the original code within our repository for the purpose of validating existing *PuzzleScript* games in our engine. Since *PuzzleScript* is provided with an MIT license, we include the same license in the *PuzzleJAX* repository. We also consulted with *PuzzleJAX*'s author, Stephen Lavelle, during this project's development.

To validate our engine, we used a script to scrape over 800 games from an online database [23], following links to Github gists containing standalone *PuzzleScript* game files. We additionally validated against the games contained in the *PuzzleScript* Gallery<sup>2</sup>, and authored a wide variety of minimal test scenarios during implementation of various features. It may also be possible to scrape games from the (currently active) *PuzzleScript* forum<sup>3</sup> (e.g. by seeking out Github gist links in threads with the "[GAME]" tag), or from Itch.io<sup>4</sup> (with these having the additional benefit of meta-data such as user ratings, comments, and number of plays; though these do not always link to the source code in a Github gist, or do not do so in a consistent way). Searching for *PuzzleScript* game file gists directly through the Github REST API may also be possible, given clever use of search keywords to circumvent pagination limits.

In this work, we do not distribute any curated dataset of actual human-authored *PuzzleScript* games. Instead, our contribution is the *PuzzleJAX* engine itself. The set of *PuzzleScript* games above are used primarily to demonstrate *PuzzleJAX*'s coverage of a vast array of possible games, and to ensure maximum interoperability with the established *PuzzleScript* DSL. Researchers may either use the *PuzzleJAX* engine to run newly designed *PuzzleScript*-style games, or to benchmark the performance of various methods on extant *PuzzleScript* games, potentially drawn from one of the sources above at their own discretion.

The exemplar *PuzzleScript* games presented in the main paper are largely drawn from the *PuzzleScript* Gallery, where they are presented with permission from the game authors. We list these exemplar games below, with links to these games in the *PuzzleScript* IDE (where they are playable and editable), and authorship credits:

- [Sokoban](#) (under Load Example -> Tutorial -> Basic Example) ported by Stephen Lavelle
- [Sokoban Match 3](#) (under Load Example -> Tutorial -> Match 3) by Stephen Lavelle
- [Lime Rick](#) by Tommy Tuovinen
- [Take Heart Lass](#) by Kevin Zuhn
- [Blocks](#) by Liam K Sheehan
- [Kettle](#) by Stephen Lavelle
- [Atlas Shrank](#) by James Noeckel
- [Multi-Word Dictionary Game](#) by Sarah Northway
- [Travelling Salesman](#) by Rabbit from Hell
- [Zen Puzzle Garden](#) by Lexaloffle
- [Notsnake](#) (under Load Example -> Elementary -> Notsnake) by Terry Cavanagh
- [Slidings](#) by Alain Broebecke
- [Constellation Z](#) (under Load Example -> Intermediate -> Constellation Z) by Stephen Lavelle

## B Ethical considerations

*PuzzleJAX* is intended as a benchmark to assist in developing more generally capable and human-like AI agents, in particular by surfacing questions about the role of insight to solve a mechanically and semantically rich space of diverse puzzle games. We acknowledge that the overarching goal

<sup>2</sup><https://www.puzzlescript.net/Gallery/index.html>

<sup>3</sup><https://groups.google.com/g/puzzlescript>

<sup>4</sup><https://itch.io/games/made-with-puzzlescript>

of creating generally capable AI agents may present both dangers and benefits to humanity. While these broader questions are out of scope for the present discussion, we believe that benchmarks like *PuzzleJAX* are crucial in understanding AI agents and learning algorithms which appear to have super-human abilities in some domains, but whose limitations are often poorly understood. *PuzzleJAX* is particularly relevant because it brings to the fore a swath of domains in which we expect many state-of-the-art agents and algorithms are likely to fail in surprising and perhaps counter-intuitive ways, even despite the apparent simplicity of the tasks at hand.

*PuzzleScript*’s DSL makes it easy, for example, to invert the canonical semantics of a game like *Sokoban*, such that with a simple variation to the game’s rules, the player now pushes a crate forward by moving *away* from it (as in [Okosban](#)). We expect that in games with such inverted or otherwise alien semantics, LLMs may have particularly difficulty in generating competent strategies (even supposing a more robust LLM-player pipeline is developed to address their difficulties in solving more canonical puzzles). As such *PuzzleJAX* can serve as an effective test of the abilities of LLMs to reason and problem-solve in the kind of out-of-distribution scenarios they may encounter once deployed into the wild, which situations may ultimately be of high consequence of users and designers.

In terms of *PuzzleJAX*’s impact on game designers, we hope that by fostering the development of more capable puzzle-solving agents, designers of *PuzzleScript* games may eventually be able to automatically playtest their games more effectively. *PuzzleScript*’s creator has recently expressed apprehension around embedding a best-first-search-driven solver agent<sup>5</sup> into the *PuzzleScript* IDE, given that it might lead designers to create games that are significantly complex or challenging from the perspective of tree search, but potentially un-interesting or less fun or enjoyable for human players<sup>6</sup>. Given that *PuzzleJAX* facilitates the development of a wide variety of AI player agents beyond simple tree search—such as those based on LLMs, or those involving Reinforcement Learning—we hope that developers might ultimately have access to a diverse set of potentially human-like agents, allowing them to automatically measure proxies of human enjoyment or satisfaction (granted, this will likely require significant algorithmic advances, and benchmarking any such proxy benchmarks against actual human playtraces and surveys).

As alluded to in our Conclusion, *PuzzleJAX* also potentially facilitates the use of LLMs or genetic programming to generate new puzzle games automatically (e.g. by leveraging metrics generated by diverse player agents inside an evolutionary loop, as in [\[30\]](#)). Concerns may be raised here around the potential for automating away the process of game design, and burying human ingenuity and artistry in a barrage of AI-generated content that maximizes superficial metrics of player retention or engagement. In this regard, we advocate for the development of design assistant tools that incorporate human feedback and allow designers to intervene in the process of automatic game generation, as in [\[36\]](#), or as in the general paradigm of design through interactive evolution [\[38, 37, 35\]](#).

## C Additional implementation and validation details

To validate the fidelity of *PuzzleJAX*, we use breadth-first search to find solutions for each level of each game in our collected dataset. We cap the number of environment steps during search at 100,000 and set a timeout of 1 minute. Where search does not find a winning state, we return the action sequence leading to the highest score, and in case of ties prefer longer action sequences (in hopes of exploring more of the game’s state space and thus ensuring a more robust validation). (The full results of this search procedure on the collected dataset of games is reported in [Table 1](#).) We then initialize each game and level in *PuzzleJAX*, and replay the action sequence, ensuring that it results both in the win conditions being met, and in an equivalent state (in terms of the layout of object in the level).

We report the results of this validation pipeline in [Table 2](#), and find that over 400 existing *PuzzleScript* games are valid in *PuzzleJAX*. Over 250 games are fully valid in *PuzzleJAX* (with each level’s solution in JavaScript resulting in the same outcome in *PuzzleJAX*), among these games with over 50 rules.

<sup>5</sup>Available at <https://github.com/Auroriox/PuzzleScriptPlus/blob/master/README.md>.

<sup>6</sup><https://x.com/increpare/status/1905568607410532690>

|                       |      |
|-----------------------|------|
| Total Games           | 955  |
| Valid Games           | 260  |
| Partially Valid Games | 147  |
| Total Levels          | 7507 |
| Successful Solutions  | 1781 |
| Compile Errors        | 102  |
| Runtime Errors        | 713  |
| Solution Errors       | 2894 |
| State Errors          | 325  |
| Unvalidated Levels    | 808  |

Table 2: Results of validating *PuzzleScript* games in *PuzzleJAX*, by using breadth-first search to generate solutions for each level in JavaScript, then replaying these solutions in JAX, and ensuring they lead to equivalent end-states.

Of the over 7,000 individual levels in our dataset, 1,781 admit valid solutions in *PuzzleJAX*. Though this already constitutes a wealth of novel tasks for learning and reasoning agents, it means that a large number of levels result in errors (or remain unvalidated—most likely due to timeouts or memory issues during compilation). A large number of compile errors likely result from *PuzzleJAX*’s not yet capturing the extensive permissiveness of *PuzzleScript*. Already, we conduct preprocessing to clean up some of the syntactic errors which *PuzzleScript* affords (e.g. in rule definitions, if the cell boundary token “|” is contained between kernels—i.e. “] | [”—it is ignored; if the line detector token “...”, which can occupy a cell within a kernel to denote that the cells on either side of it may be separated by an arbitrary number of tiles, appears between kernels—i.e. “[...]”—the kernels are joined and the line detector is placed within its own cell in the kernel), but more examination of those games which cause issues with our Lark parser after pre-processing will be necessary to improve interoperability with *PuzzleScript*.

Solution errors—discrepancies between the win-state resulting from the solution found in JavaScript and that resulting from replaying the same solution in *PuzzleJAX*—usually indicate some difference between implementations of mechanics in the JavaScript and JAX engines, and continued development will seek to address them. During development of *PuzzleJAX*, for example, we used such discrepancies to ensure that rules were being broken down into rotational variants in the right order (so that, in *Carnival Shooter!*, for example, when the player “shoots” while next to two enemies, the enemy to the left of the player will be removed before the enemy to their right).

The one major feature which, to our knowledge, remains unimplemented in *PuzzleJAX* is the “rigid” keyword, which is used to simulate rigid-body physics. The use of this keyword appears in only 9 games in our dataset (leading to 9 compilation errors). We omit it for simplicity, given that its implementation appears relatively involved, and would require the use of additional channels in our level-state representation. The *PuzzleScript* documentation stresses this point, in fact (with the author writing that they “kinda regret adding this keyword to the engine”) and strongly advises the user to deploy other strategies to simulate rigid-body physics<sup>7</sup>.

In addition to the features described in the body of this paper, we note that we also implement the “line detector” feature (denoted in the *PuzzleScript* DSL as an ellipsis), which recognizes patterns separated by an arbitrary number of tiles along a row or column. Under the hood, we treat line detectors as a special kind of kernel that detect sub-kernels (the groups of cells on either side of the ellipsis) across the board, then detect if these subkernels’ activations fall in some ordered sequence along a line. These sequences are considered in order of the least to the most space between the sub-kernels. The line projection function then iterates through these detected lines in order, attempting to apply their respective subkernels until this has an effect on the board.

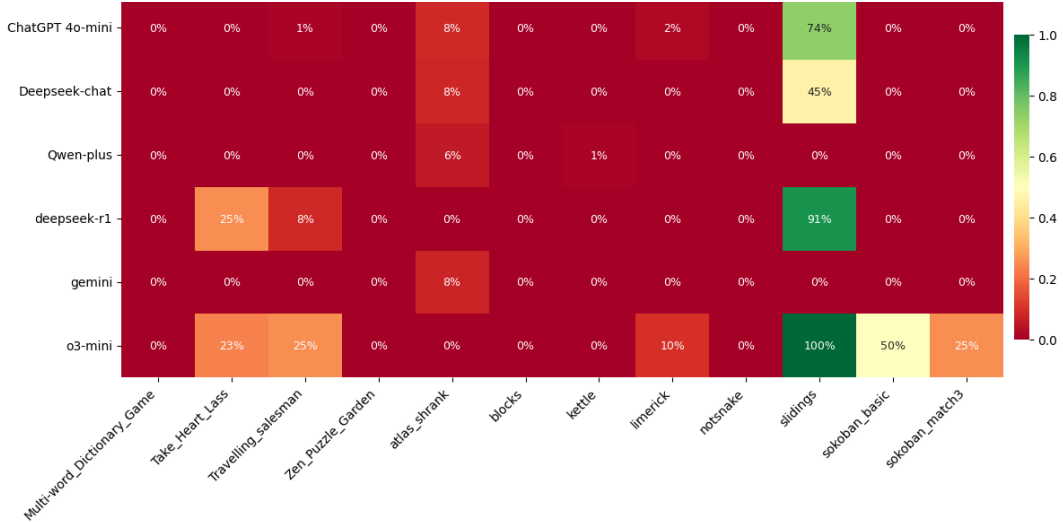

Figure 5: Average win rate comparison across different language models and games. The heatmap shows performance variations where darker red indicates lower performance (0%) and green indicates higher performance (up to 100%). Each cell represents the average win rate of a specific model on a particular game task.

## D Additional results

### D.1 LLMs

For our LLM experiments, we employed both reasoning-enabled LLMs and non-reasoning LLMs. Based on the experimental results presented in Figure 5, we observe significant performance variations across different LLMs when evaluated on 12 distinct games compiled in *PuzzleJAX*. The findings reveal that all model performance is highly task-dependent, with no single model demonstrating consistent superiority across all evaluated games. Notably, o3-mini achieved perfect performance (100% win rate) on the *Slidings* puzzle task and demonstrated strong capabilities in several other games, including *Sokoban Basic* (50%), *Take Heart Lass* (23%), *Travelling Salesman*, and *Sokoban match 3* (25%). DeepSeek-R1 exhibited exceptional performance on the *Slidings* puzzle task (91% win rate) while showing moderate success in strategic games such as *Take Heart Lass* (25%) and *Travelling salesman* (8%). ChatGPT-4o-mini displayed a more balanced performance profile, achieving its highest success rate on the *Slidings* puzzle (74%) and moderate performance on *Atlas Shrank* (8%) and *Limerick* (2%). In contrast, models such as Qwen-plus and Gemini showed limited success across most tasks, with Qwen-plus achieving only 6% on *Atlas Shrank* and 1% on *Kettle*, while Gemini’s performance peaked at 8% on *Atlas Shrank*. The results suggest that certain games, particularly *Slidings* puzzles, may be more amenable to current language model capabilities, while others such as *Multi-Word Dictionary Game*, *Blocks*, *Notsnake*, and *Zen Puzzle Garden*, remain challenging across all evaluated models.

### D.2 Reinforcement learning

For our Reinforcement Learning experiments, we use the fully-jitted training loop written in JAX provided by [14], allowing us to take advantage of *PuzzleJAX*’s jitted environment step function. (We add utilities for saving model checkpoints and rendering episodes intermittently during training.) We use the above repo’s default hyperparameters for PPO, training agents on each level over 5 different random seeds for a total of 5 million environment steps each, with a learning rate of  $1e^{-4}$ , 128 rollout steps per minibatch, with 4 minibatches and 10 update epochs, with a  $\gamma = 0.99$ , an entropy coefficient of 0.01 and a value function coefficient of 0.5. We set batch size as large as possible for each game and level combination within the constraints of the VRAM available on the GPUs we use for training.

<sup>7</sup><https://www.puzzlescript.net/Documentation/rigidbody.html>

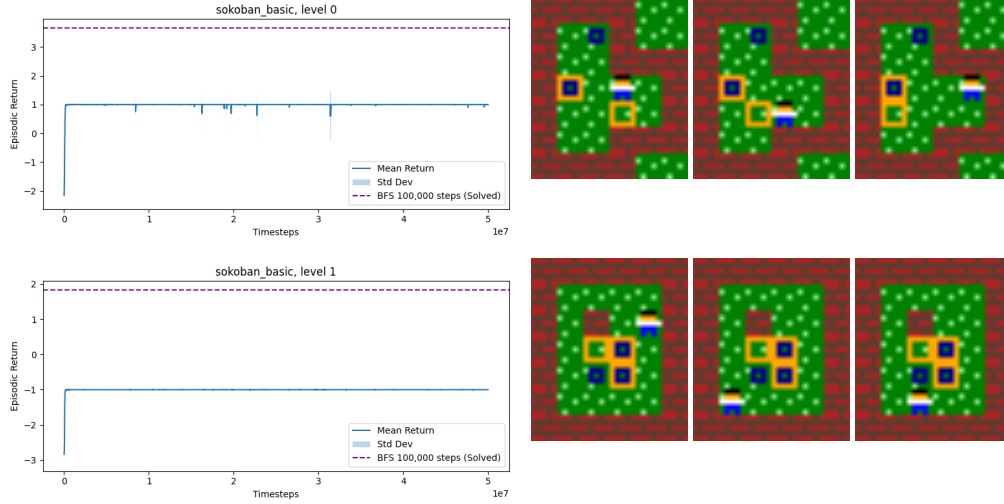

Figure 6: Comparison of RL against breadth-first search in *Sokoban*. Episode rollouts from RL are pictured on the right. Here, the agent greedily maximizes the heuristic (the sum of manhattan distances between targets and their nearest crates), preventing discovery of optimal solutions.

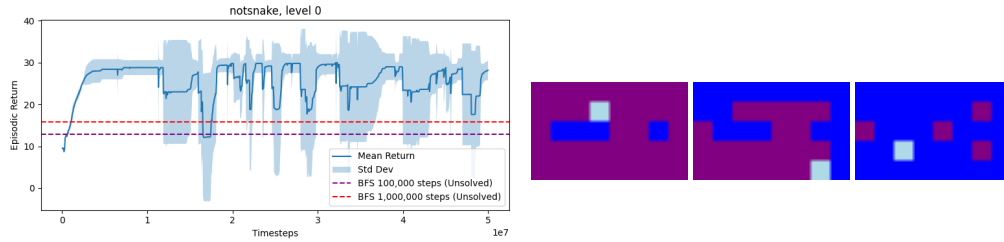

Figure 7: Comparison of RL against breadth-first search in *Notsnake*. Episode rollouts from RL is pictured on the right.

We use our institution’s high-performance computing cluster for training, and include in our code-base scripts for deploying sweeps of training jobs to nodes in this cluster via SLURM (we provide similar scripts in order to parallelize the tree search and JAX episode-rollouts in our *PuzzleJAX* validation pipeline). The GPUs on this cluster include the NVIDIA RTX8000, V100, A100, and H100, and the AMD MI100 and MI250. (We use a separate consumer machine with an NVIDIA 4090 for our speed profiling experiments).

While RL can be deceived by the heuristic functions of *Sokoban Basic* (Figure 6) and *Limerick* (Figure 8), in which positive reward can be sparse and optimal solutions may require first moving circuitously “away” from rewarding states, it does well in games admitting very short solutions such as *Slidings* (Figure 9) and *Kettle* (Figure 10), and games that constitute dense reward combinatorial optimization problems such as *Notsnake* (Figure 7), where it even discovers a better solution than did breadth-first search after 1 million environment steps (though it still does not discover the *exact* solution). (Note however that this does not necessarily constitute a fair comparison, which would arguably require running search for an equal number of environment steps, and/or comparing the wall clock times of each algorithm.) In *Take Heart Lass* (Figure 11), agents perform well in early levels which effectively constitute a simple control task involving running away from the encroaching despair and toward a goal, whereas on later levels that require efficiently pushing blocks to clear paths in the nick of time, or block or undo the propagation of despair tiles, the agent often runs into dead-ends or otherwise winds up trapped by despair tiles while attempting to bee-line toward to goal tile.

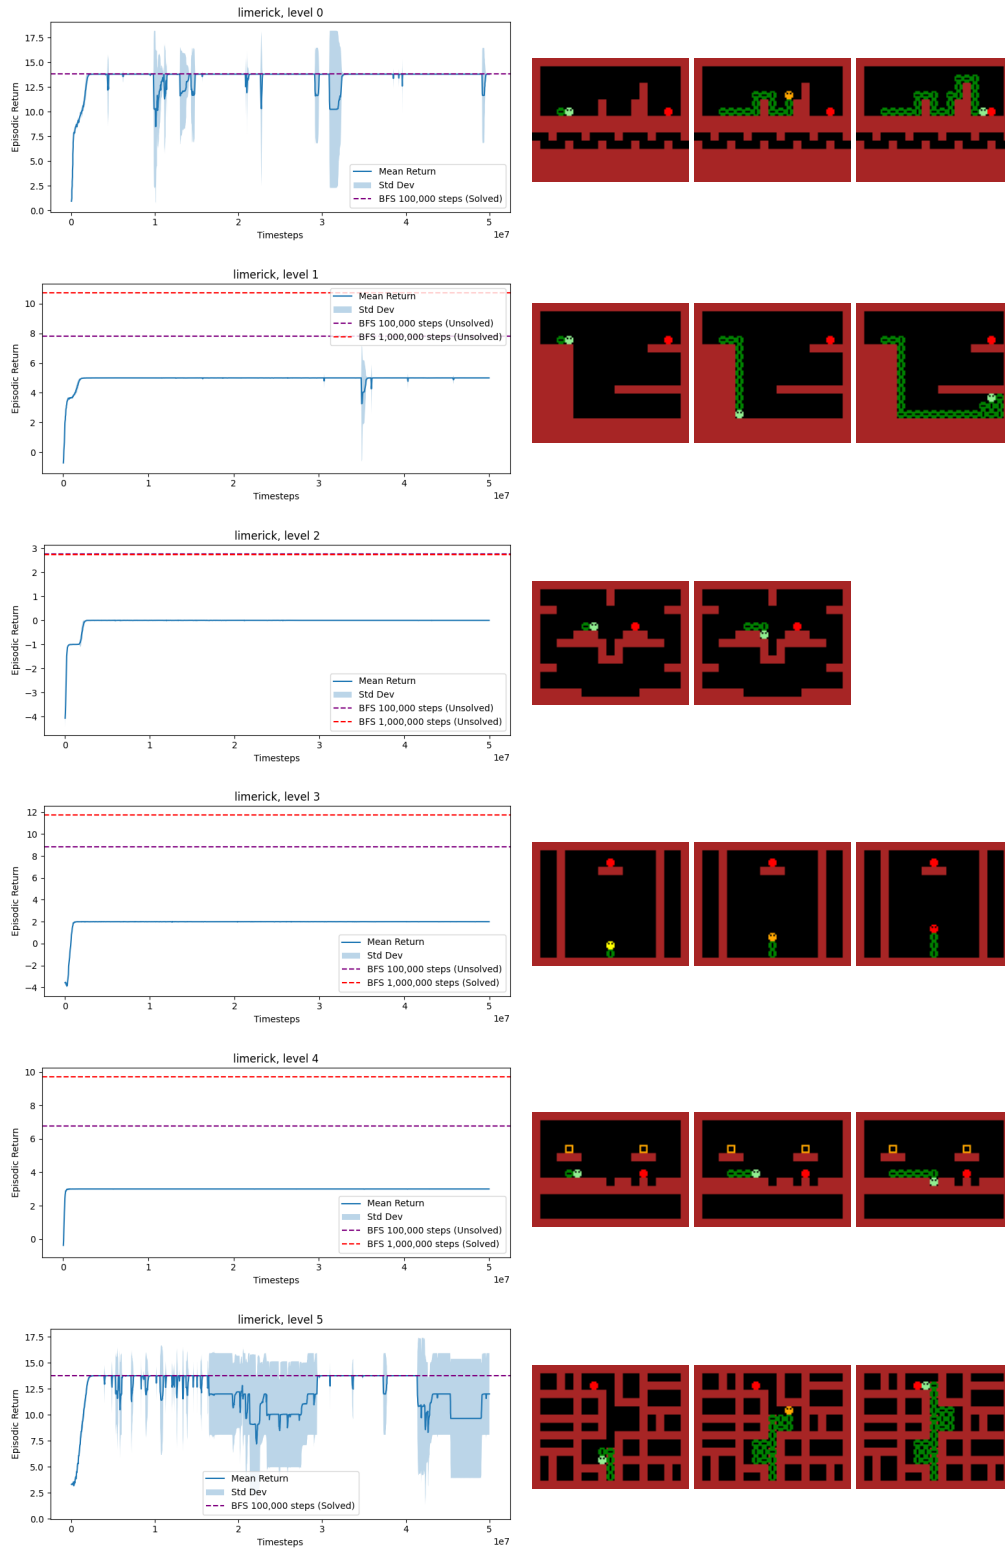

Figure 8: Comparison of RL against breadth-first search in *Limerick*. Episode rollouts from RL are pictured on the right. Agents only master levels with a relatively straightforward path to the goal. They do not generally uncover strategies involving significant roundabouts away from the goal, and can fall prey to “obvious” traps along the more direct path.

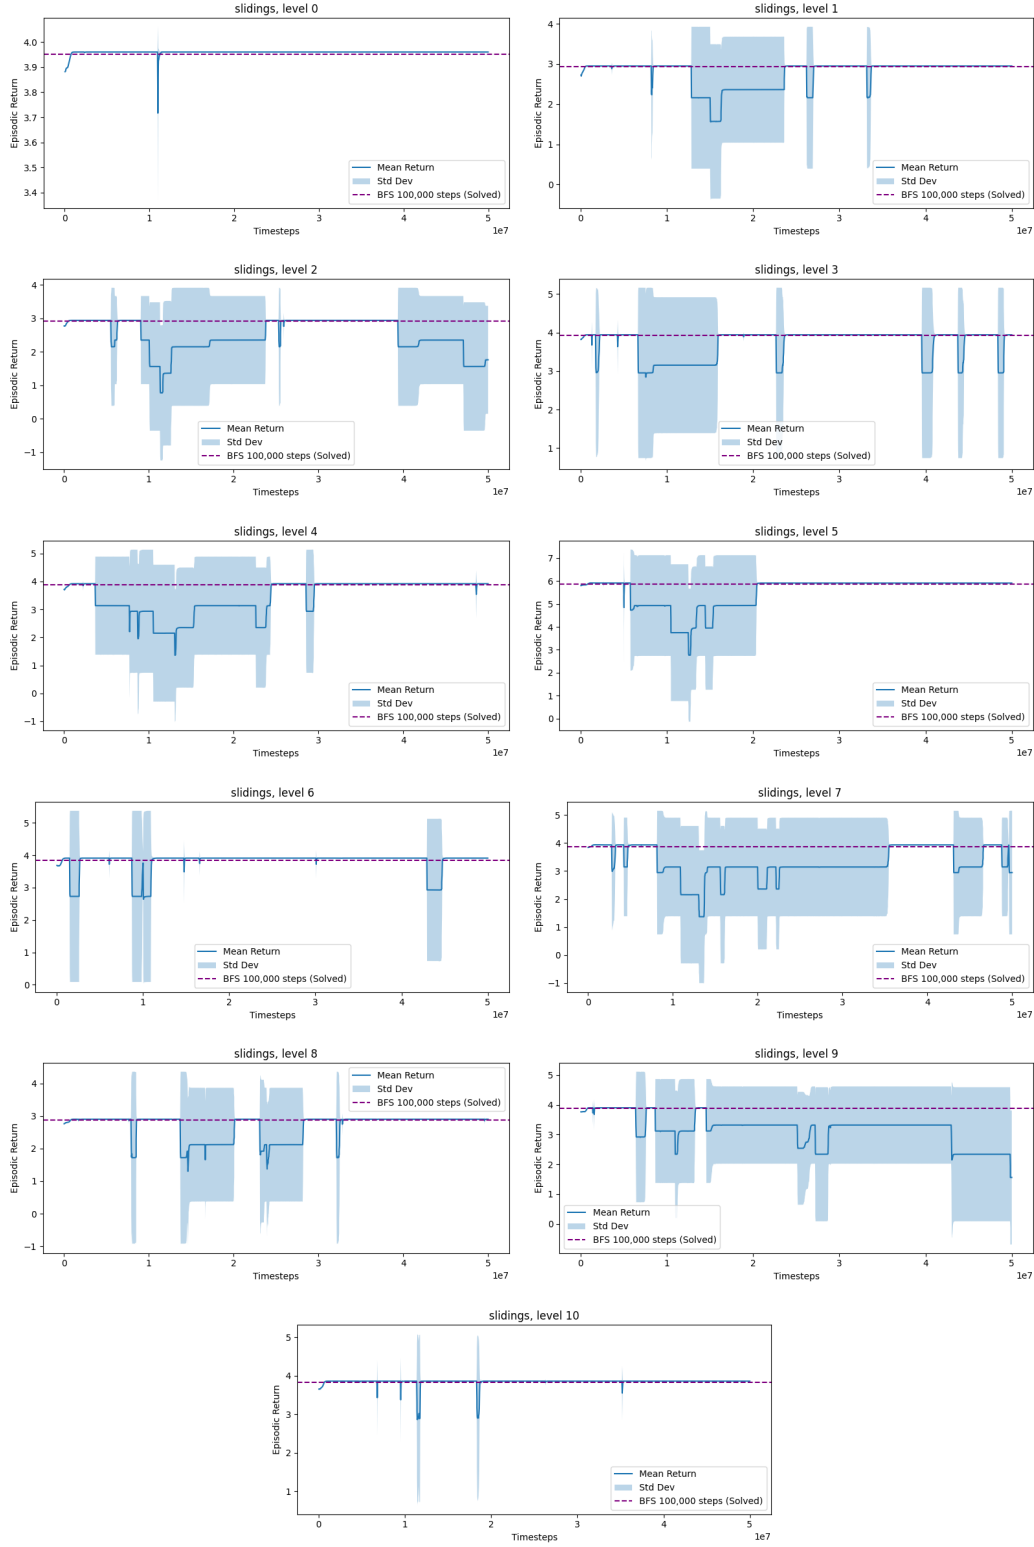

Figure 9: Comparison of RL against breadth-first search in *Slidings*.

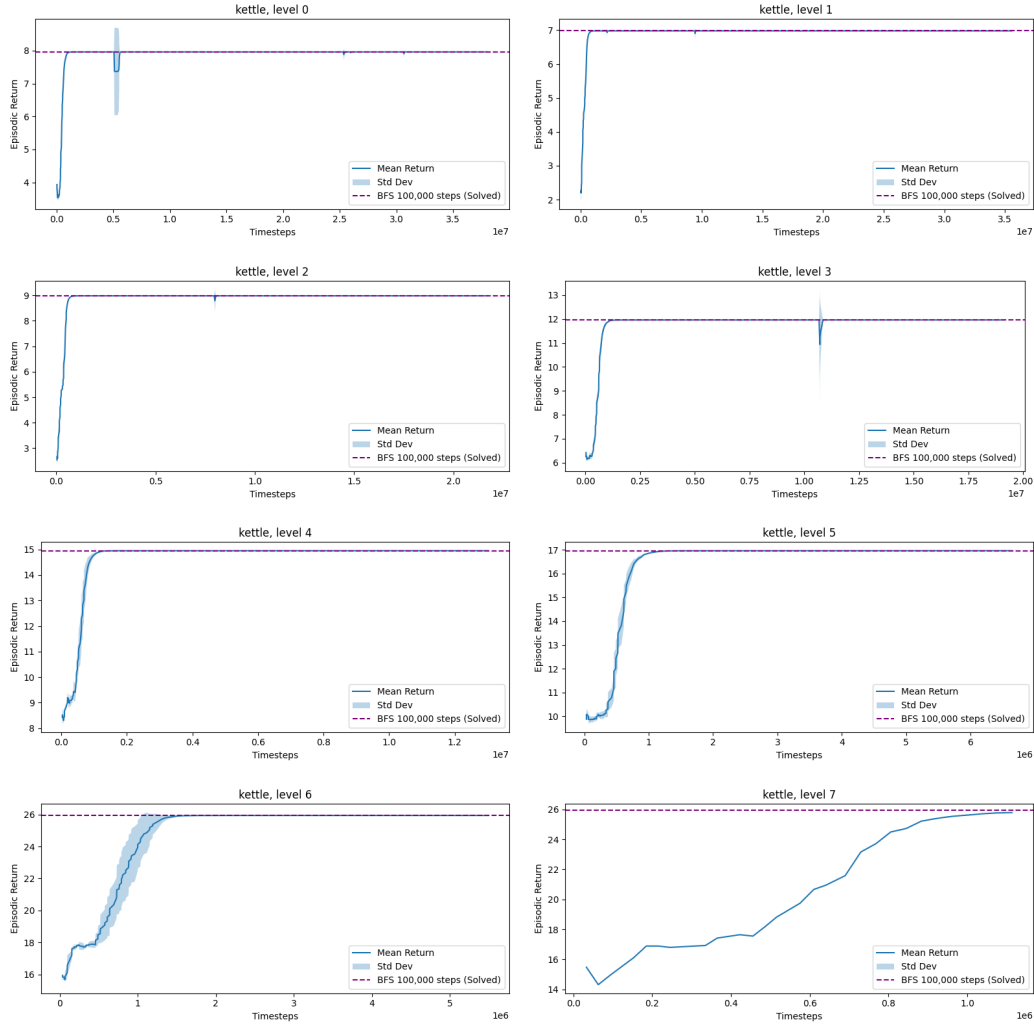

Figure 10: Comparison of RL against breadth-first search in *Kettle*. RL agents are able to find optimal solutions, which involve a short sequence of actions, though the time taken to learn this optimal strategy steadily increases as levels (and optimal action sequences) grow and complexify.

### 945 D.3 Tree search

946 We run breadth-first search on our full dataset of games, capping the number of environment steps  
 947 at 100,000, and setting a timeout of 1 minute in [Table 5](#).



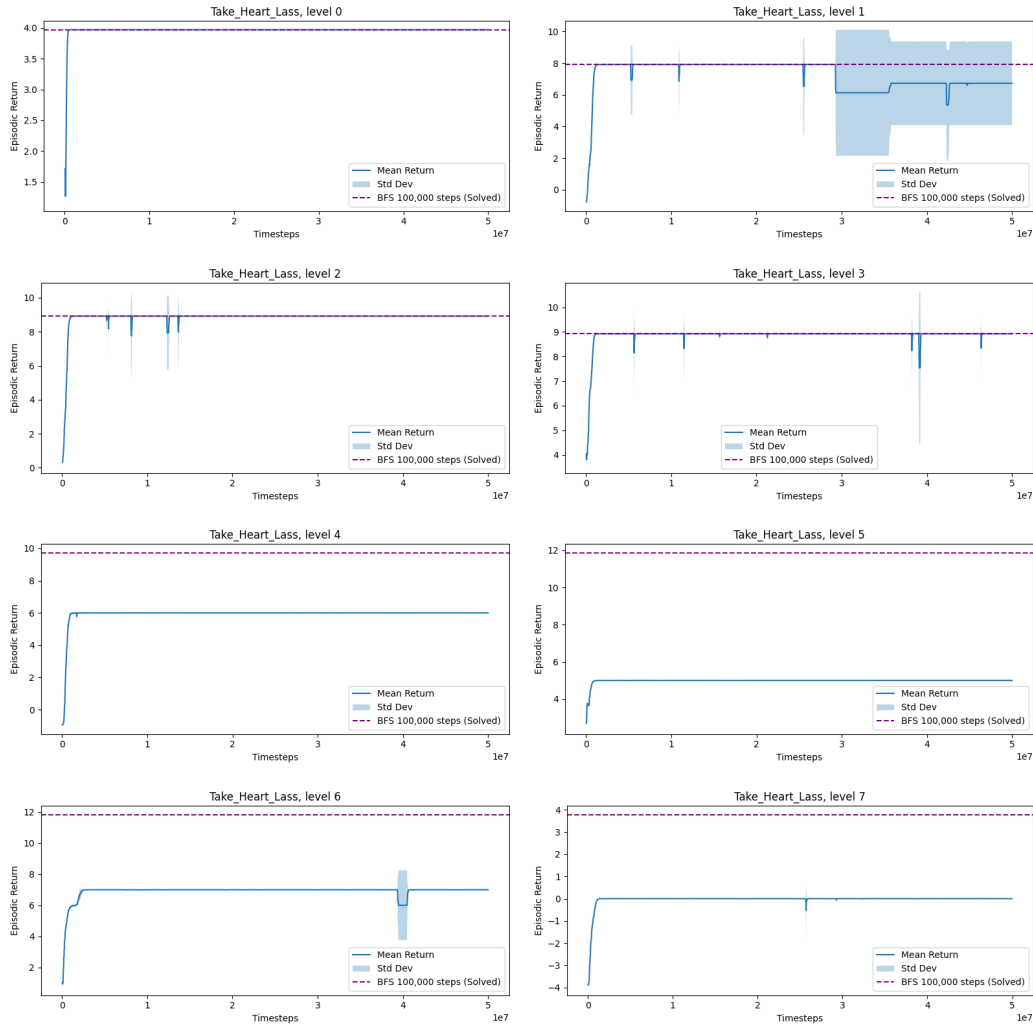

Figure 11: Comparison of RL against breadth-first search in *Take Heart Lass*. RL can handily find solutions to early levels which involve effectively evolve running away from encroaching despair and toward a goal, but it has difficulty in later levels that introduce the use of pushable hearts to strategically block the despair's advance.

Listing 1: Example of a *PuzzleScript* file (*LimeRick*)

```
title Lime Rick
author Tommi Tuovinen
homepage http://www.kissmaj7.com/

(Ported with the very gracious permission of Tommi Touvinen
The first ten levels of a neato game - you can play the full version here
http://www.kongregate.com/games/KissMaj7/lime-rick
The full version includes some mechanics that aren't covered in the levels here,
but they are supported.)

=====
OBJECTS
=====

Background
black
```

```
Exit
red
.000.
00000
00000
00000
.000.

Apple
blue
.000.
00000
00000
00000
.000.

PlayerBodyH
green
.000.
00000
0...0
00000
.000.

PlayerBodyV
green
.000.
00.00
00.00
00.00
.000.

Crate
orange
00000
0...0
0...0
0...0
00000

PlayerHead1
lightgreen
.000.
0.0.0
00000
00000
.000.

PlayerHead2
yellow
.000.
0.0.0
00000
00000
.000.

PlayerHead3
orange
.000.
0.0.0
00000
00000
.000.

PlayerHead4
```

```

red
.000.
0.0.0
00000
00000
.000.

Wall
brown

=====
LEGEND
=====

Player = PlayerHead1 or PlayerHead2 or PlayerHead3 or PlayerHead4
Obstacle = PlayerBodyH or PlayerBodyV or Wall or Crate or Player
PlayerBody = PlayerBodyH or PlayerBodyV
. = Background
P = PlayerHead1
# = Wall
E = Exit
A = Apple
C = Crate

=====
SOUNDS
=====

sfx0 3295707 (player jump)
sfx1 3538707 (player jump to max)
sfx2 42451307 (player move horizontally)
endlevel 96434300
startgame 49875902

=====
COLLISIONLAYERS
=====

Background
Exit, Apple
PlayerBody
Player, Wall, Crate

=====
RULES
=====

(this game handles all the movement stuff itself - it removes all movements before
the movement phase has a chance to tick at all)

UP [ UP PlayerHead4 ] -> [ PlayerHead4 ]
UP [ UP PlayerHead3 | No Obstacle ] -> [ PlayerBodyV | PlayerHead4 ] sfx1
UP [ UP PlayerHead2 | No Obstacle ] -> [ PlayerBodyV | PlayerHead3 ] sfx0
UP [ UP PlayerHead1 | No Obstacle ] -> [ PlayerBodyV | PlayerHead2 ] sfx0

horizontal [ > Player | Crate | No Obstacle ] ->
[ PlayerBodyH | PlayerHead1 | Crate ] sfx2

horizontal [ > Player | No Obstacle ] -> [ PlayerBodyH | PlayerHead1 ] sfx2

[ Player Apple ] [ PlayerBody ] -> [ Player Apple ] [ ]
[ Player Apple ] -> [ Player ]

[ > Player ] -> [ Player ]

```

```
DOWN [ Player | No Obstacle ] -> [ PlayerBodyV | PlayerHead1 ]
DOWN [ Crate | No Obstacle ] -> [ | Crate ]
```

```
=====
WINCONDITIONS
=====
```

```
some player on exit
```

```
=====
LEVELS
=====
```

```
message level 1 of 10
```

```
#####
#.....#
#.....#
#.....#...#
#.....#...#
#.....#...#
#..P...#...#..E.#
#####
#####
..#...#...#...#
#...#...#...#...#
#####
#####
#####
```

```
(additional levels omitted for clarity)
message congratulations!
```

Table 3: PuzzleScript games in which all levels were successfully validated in JAX (vis-a-vis solutions generated by breadth-first search in JavaScript).

| Game                             | # Rules |
|----------------------------------|---------|
| Miner To Miner Empire            | 0       |
| There is no-one here to help you | 0       |
| blocks                           | 0       |
| sokoban sanity                   | 1       |
| sokoban sticky                   | 1       |
| sumo                             | 1       |
| test                             | 1       |
| wrappingrecipe                   | 1       |
| Clones                           | 1       |
| Carnival Shooter                 | 1       |
| ESCAPE!                          | 1       |
| Futuristic Block Pushing Game    | 1       |
| Carnival Shooter!                | 1       |
| Bad Example                      | 1       |
| opposition test                  | 1       |
| microban                         | 1       |
| blank                            | 1       |
| Swap the block!                  | 1       |
| Time-reversed Microban           | 1       |
| Swap Sokoban                     | 1       |
| Sokubunny and the colored Boxes  | 1       |
| Sokoban Flipped                  | 1       |
| Sokoban...                       | 1       |
| Skeleton Assembler               | 1       |
| Pulling Box Sokoban              | 1       |
| Piedra                           | 1       |
| Opposition                       | 1       |
| Okosban                          | 1       |
| Microban I                       | 1       |
| Microban                         | 1       |
| Lis' game development adventure  | 1       |
| King of walls                    | 1       |
| sokoban basic zoomscreen         | 1       |
| sokoban basic debug              | 1       |
| sokoban basic                    | 1       |
| soko and the band test           | 1       |
| secrets test                     | 1       |
| perpendicular test               | 1       |
| sokoban horizontal               | 1       |
| sokoban eyeball                  | 1       |
| rigidfail1                       | 2       |
| sokoban match3                   | 2       |
| naughtysprite                    | 2       |
| notsnake                         | 2       |
| twolittlecrates1                 | 2       |
| actiontest                       | 2       |
| Crafting Table                   | 2       |
| Cyberpunk 2020                   | 2       |
| Love and Pieces                  | 2       |
| Puzzle-Design Homework           | 2       |
| Roze                             | 2       |
| Silly Rabbit                     | 2       |

Continued on next page

Table 3: PuzzleScript games in which all levels were successfully validated in JAX (vis-a-vis solutions generated by breadth-first search in JavaScript).

| Game                           | # Rules |
|--------------------------------|---------|
| TwinPush                       | 2       |
| GDD301 Demo Game               | 2       |
| colorban test                  | 2       |
| dot puzzle test                | 2       |
| gdd301 test                    | 2       |
| lovendpieces                   | 2       |
| Deltarune block pushing game   | 2       |
| Duplex                         | 2       |
| Escape the Void Full           | 2       |
| Labyrinth                      | 2       |
| Ice Block Game                 | 2       |
| Come Doggo come - Alliteration | 3       |
| zenpuzzlegarden                | 3       |
| Zen Puzzle Garden              | 3       |
| Time-Reversed Minicosmos       | 3       |
| Undertale X O Puzzle           | 3       |
| Veggie Jam                     | 3       |
| 1D Sokoban                     | 3       |
| Bridge                         | 3       |
| Maze it all                    | 3       |
| Snow                           | 3       |
| Soko-bine                      | 3       |
| Deadly Cat Maze                | 3       |
| Footprint Puzzle               | 3       |
| Harvesting Apples              | 3       |
| Harvesting Apples II           | 3       |
| Kill the eyes                  | 3       |
| scriptcross                    | 3       |
| rigid 11                       | 3       |
| The Land Of Secrets            | 4       |
| Travelling salesman            | 4       |
| Snake Crate                    | 4       |
| Remote Control Sokoban         | 4       |
| RAFTURE 2 SALVATION            | 4       |
| Tele                           | 4       |
| All These Damn Crates          | 4       |
| Monster block push game        | 4       |
| Multi-word Dictionary Game     | 4       |
| Brush Runner                   | 4       |
| Bubble Boy                     | 4       |
| Cuddlefish                     | 4       |
| Handle with Care               | 4       |
| Ice Maze                       | 4       |
| Modality                       | 4       |
| modality                       | 4       |
| wordgame                       | 4       |
| constellationz                 | 4       |
| leftrighnpcs                   | 4       |
| wall scout                     | 5       |
| TipOver                        | 5       |
| twolittlecrates3               | 5       |
| twolittlecrates4               | 5       |
| octat test                     | 5       |

Continued on next page

Table 3: PuzzleScript games in which all levels were successfully validated in JAX (vis-a-vis solutions generated by breadth-first search in JavaScript).

| Game                                                          | # Rules |
|---------------------------------------------------------------|---------|
| twolittlecrates2                                              | 5       |
| Lufia Puzzle Remake                                           | 5       |
| Merge and Swap                                                | 5       |
| Box Fill                                                      | 5       |
| Broken Leg Sokoban                                            | 5       |
| Every Three Steps You Hit a Wall Out of Nowhere               | 5       |
| I Only Play REAL Multiban                                     | 5       |
| Roots                                                         | 5       |
| Poop and Salad Have Different Mindsets                        | 5       |
| PS Paint                                                      | 5       |
| octat                                                         | 5       |
| lunar lockout                                                 | 5       |
| Indiana Jones And His Adventure In The Lost Temple Of Owls... | 6       |
| Isle of Sokoban                                               | 6       |
| Ocean Treasure                                                | 6       |
| Racist Dogs                                                   | 6       |
| Power Problems                                                | 6       |
| Pac-Puzzler                                                   | 6       |
| Impossible Sokoban                                            | 6       |
| Bubblegoban                                                   | 6       |
| Algorithm-Generated Sokoban Levels                            | 6       |
| Amy                                                           | 6       |
| Bottomless puzzle-adventure                                   | 6       |
| Tile Tiler                                                    | 6       |
| Stuffle                                                       | 6       |
| window hero                                                   | 6       |
| Eyes On You                                                   | 7       |
| Combine!                                                      | 7       |
| Sokocross                                                     | 7       |
| Son of Pacman                                                 | 7       |
| Dreaming of Strawberries                                      | 7       |
| Shroom Party!                                                 | 7       |
| Roller Boi                                                    | 7       |
| blockfaker                                                    | 7       |
| rigid scott1                                                  | 7       |
| Escaping Limbo                                                | 8       |
| Reap                                                          | 8       |
| Stand aside, everyone! I take large steps!                    | 8       |
| ZigZag Ice                                                    | 8       |
| ebony and ivory                                               | 9       |
| The Blob                                                      | 9       |
| Ebony & Ivory                                                 | 9       |
| It Is Pitch Black                                             | 9       |
| Mimic Translation                                             | 9       |
| Sluzzle                                                       | 9       |
| Stickyban                                                     | 9       |
| Switcheroo                                                    | 9       |
| Absorb                                                        | 9       |
| =lost=                                                        | 9       |
| ESL Puzzle Game – CHALLENGE MODE                              | 10      |
| Game One                                                      | 10      |
| Kicking walls                                                 | 10      |
| Path Finder                                                   | 10      |

Continued on next page

Table 3: PuzzleScript games in which all levels were successfully validated in JAX (vis-a-vis solutions generated by breadth-first search in JavaScript).

| Game                                            | # Rules |
|-------------------------------------------------|---------|
| Skull Contraption                               | 10      |
| Slidings                                        | 10      |
| slidings                                        | 10      |
| Add Man 2 This Time It's Arithmetical           | 10      |
| limerick                                        | 11      |
| Tractor Beam Sokoban9                           | 11      |
| Stand II                                        | 11      |
| Rush Hour                                       | 11      |
| Lime Rick                                       | 11      |
| Colorban                                        | 12      |
| Yin-Yang                                        | 12      |
| Jump Fox                                        | 12      |
| Fractured Identity                              | 13      |
| 2020                                            | 13      |
| The Growth of H'Ragh                            | 13      |
| Palette                                         | 13      |
| Variations                                      | 13      |
| This Adventure World                            | 13      |
| AutoDom                                         | 13      |
| kettle                                          | 14      |
| Rolling-block colour-zone mazes                 | 14      |
| Kettle                                          | 14      |
| Painter                                         | 14      |
| Together Alone                                  | 14      |
| Bichrome                                        | 15      |
| Tempting Fate                                   | 15      |
| Weird Bug II Weird Bugger                       | 15      |
| Abel's Warehouse                                | 15      |
| No Right Turn Sokoban                           | 15      |
| Mitosys                                         | 15      |
| FS Game Dev Workshop                            | 15      |
| Omnipresent                                     | 15      |
| Prototype Demo v1                               | 16      |
| Leo                                             | 16      |
| Knight's Tour                                   | 16      |
| take heart lass                                 | 17      |
| Sticky v0.901                                   | 17      |
| Straighten Up                                   | 17      |
| Hysteresis mazes                                | 17      |
| Take Heart Lass                                 | 17      |
| Clean Up                                        | 17      |
| Castle Duck!                                    | 17      |
| Darkness Sokoban                                | 18      |
| Solitaire                                       | 18      |
| BUDS                                            | 18      |
| Last day of the year                            | 18      |
| I Have No Mouth, And I Must Find My Hiding Spot | 19      |
| smother                                         | 19      |
| Puzzleboi                                       | 19      |
| Towers of Saigon                                | 20      |
| I Have No Mouth, And I Cannot Push Two Boxes    | 20      |
| No Fault of My Own                              | 20      |
| Color Combination                               | 20      |

Continued on next page



Table 3: PuzzleScript games in which all levels were successfully validated in JAX (vis-a-vis solutions generated by breadth-first search in JavaScript).

| Game                                                           | # Rules |
|----------------------------------------------------------------|---------|
| The Block Tower                                                | 20      |
| Heroes of Sokoban - Ancient Japan                              | 20      |
| Hitori                                                         | 21      |
| Rob's first game                                               | 21      |
| Multiply                                                       | 21      |
| Hill Buddies                                                   | 21      |
| Hanoi Winter                                                   | 21      |
| Linked                                                         | 22      |
| Lawn-Mowing Robot                                              | 22      |
| Wrap                                                           | 23      |
| I Have No Mouth, And I Must Toggle Blocks On All Sides Of M... | 23      |
| Detroit Become Immense                                         | 23      |
| magnetic                                                       | 23      |
| Omniban                                                        | 24      |
| candy saga 2 turbo edge                                        | 24      |
| 9x9 Go                                                         | 27      |
| Life at Home Depot                                             | 27      |
| Meatball                                                       | 27      |
| Stick-with-it mazes                                            | 27      |
| Stairs                                                         | 27      |
| Circulando                                                     | 27      |
| Candy's Crushes Saga                                           | 28      |
| Light Maze                                                     | 28      |
| PackBot                                                        | 30      |
| Do You Want to Build a Snowman                                 | 30      |
| Memory path                                                    | 31      |
| Paint                                                          | 31      |
| rigid many many                                                | 31      |
| rigid many many2                                               | 31      |
| Pipe Game                                                      | 34      |
| cakemonsters                                                   | 34      |
| firefighting                                                   | 34      |
| Twin Drop                                                      | 35      |
| Gears                                                          | 36      |
| Yin Yang                                                       | 36      |
| Rainbow Apples                                                 | 37      |
| Tornado Tamer                                                  | 38      |
| A port of Puzzle Wizard IQ 130+, level 18 of 72                | 40      |
| Shared Bridges Game                                            | 40      |
| Pong                                                           | 41      |
| Fabric                                                         | 42      |
| Puzzle Snake                                                   | 44      |
| RBG                                                            | 51      |
| Puzzle Stitch                                                  | 58      |
| Two-faced                                                      | 67      |
| Flippin' Ladybug                                               | 75      |
| Upstairs Downstairs                                            | 75      |
| At Last, A Ninja!                                              | 80      |

Table 4: PuzzleScript games in which one or more levels were successfully validated in JAX (vis-a-vis solutions generated by breadth-first search in JavaScript).

| Game                                | # Rules |
|-------------------------------------|---------|
| Minimalist                          | 1       |
| Password                            | 1       |
| the undertaking                     | 1       |
| zelda fan game                      | 1       |
| Government Final Exam               | 1       |
| random test                         | 1       |
| Dot Puzzle 3.1                      | 2       |
| Mice and Cheese                     | 2       |
| atlas shrank test                   | 2       |
| the walls are closing in on me      | 3       |
| Zombie Invasion                     | 3       |
| COIN COLLECTORS                     | 3       |
| Teh Interwebs                       | 4       |
| Greedy Explorer                     | 4       |
| 3 brothers                          | 4       |
| Stand                               | 5       |
| Zanzlanz Adventures                 | 5       |
| The electrician                     | 6       |
| Nirvana                             | 6       |
| Dead Grass                          | 6       |
| byyourside                          | 6       |
| Cancel                              | 7       |
| Black & White                       | 7       |
| AVGN Dis-Ventures                   | 7       |
| Some lines were meant to be crossed | 7       |
| Little Girl, Big World              | 7       |
| LameLightsOut                       | 7       |
| MazezaM                             | 8       |
| Nethack Sokoban                     | 8       |
| The Dragon's Gold                   | 8       |
| Sokoban Dungeon                     | 8       |
| mazezam                             | 8       |
| Dragon Quest                        | 8       |
| Boxes                               | 8       |
| The Trouble with Toasters           | 8       |
| Union Move                          | 9       |
| Brotherhood                         | 9       |
| Delicious Ships!                    | 9       |
| Glue Factory                        | 9       |
| RED GREEN BLUE                      | 9       |
| Unity                               | 10      |
| Lime Richard                        | 11      |
| Bridge-toggle Maze                  | 11      |
| Circuit Breaker                     | 11      |
| Stand III                           | 11      |
| Line of Sight                       | 11      |
| The Dungeon of Squeamish Chickens   | 11      |
| Flood                               | 12      |
| Hamiltwo                            | 13      |
| Cold Feet Sokoban                   | 13      |
| Rook Game                           | 13      |
| Rocketman                           | 14      |

Continued on next page

Table 4: PuzzleScript games in which one or more levels were successfully validated in JAX (vis-a-vis solutions generated by breadth-first search in JavaScript).

| Game                              | # Rules |
|-----------------------------------|---------|
| Directioban                       | 14      |
| Electric Slide                    | 14      |
| NAND Circuit Simulator            | 14      |
| Random Color Maze                 | 14      |
| Pontoluvian StraightJacket Puzzle | 14      |
| Turn-based Pac-man                | 14      |
| Two-Bit's Sacraficial Adventure   | 14      |
| Rewindoban                        | 14      |
| Pitman MZ-700                     | 15      |
| Sokolor EX                        | 15      |
| Stepping Stones                   | 15      |
| Midas                             | 15      |
| midas                             | 15      |
| Emerita                           | 16      |
| Knightoban                        | 16      |
| Involuntary Line Force Plus       | 16      |
| The Adventures of Red and Blue!   | 16      |
| Pants, Shirt, Cap                 | 17      |
| where did all this ice come from  | 17      |
| Match Flow                        | 18      |
| Pushcat Jr                        | 19      |
| Candy Bomb                        | 20      |
| The Irrigation Game               | 20      |
| Strong Fish                       | 20      |
| Grandma's Christmas Kisses        | 20      |
| Nyetris DEMOv1.8                  | 21      |
| Hero                              | 21      |
| Bricks and Hammer                 | 21      |
| The Saga of the Candy Scroll      | 21      |
| Hector                            | 21      |
| the saga of the candy scroll      | 21      |
| Heroes of Sokoban                 | 22      |
| heroes of sokoban                 | 22      |
| Heroes of sokoban edited          | 22      |
| stick candy puzzle saga           | 22      |
| Bat Loves Lava Shark              | 23      |
| Lights Out                        | 23      |
| The Nuevo Asylum                  | 24      |
| Coin Eater                        | 24      |
| Gravity Sokoban                   | 24      |
| Pumpkin smasher                   | 26      |
| Eschoban                          | 26      |
| Misaligned                        | 26      |
| Pink Matter                       | 26      |
| The Beginning, The End            | 26      |
| Neutralize                        | 28      |
| dungeon janitor                   | 28      |
| tiny treasure hunt                | 28      |
| Party Leaver 0.02                 | 28      |
| PuzzleScript Cell Machine Test    | 28      |
| Blind Ninja                       | 28      |
| Dungeon Janitor                   | 28      |
| ledchallenge                      | 28      |

Continued on next page

Table 4: PuzzleScript games in which one or more levels were successfully validated in JAX (vis-a-vis solutions generated by breadth-first search in JavaScript).

| Game                                                            | # Rules |
|-----------------------------------------------------------------|---------|
| PWARE SKEG v1.1                                                 | 29      |
| push                                                            | 30      |
| PUSH                                                            | 30      |
| collapse                                                        | 31      |
| Brendan loves mondays                                           | 31      |
| The Adventures of Pablo Diego Jose Francisco de Paula Juan N... | 33      |
| Baguettes                                                       | 33      |
| Pousser des caisses                                             | 34      |
| Tumblebox                                                       | 34      |
| Clean your room                                                 | 34      |
| Mow Problems                                                    | 34      |
| Janitor Ted                                                     | 35      |
| Switchboard Operator                                            | 35      |
| Heroes of Sokoban and Other Tales The Ranger                    | 36      |
| something                                                       | 36      |
| Boulderban                                                      | 37      |
| Sticky Cubes                                                    | 38      |
| Manic Ammo                                                      | 38      |
| Dinosaur Love Story                                             | 38      |
| manic ammo                                                      | 38      |
| Pegs                                                            | 39      |
| Sokofun Clone                                                   | 41      |
| Crate Rotate                                                    | 42      |
| chaos wizard                                                    | 42      |
| Dinosaur Love Story Bonus Levels                                | 43      |
| atlas shrank                                                    | 44      |
| Atlas Shrank                                                    | 44      |
| rotate fall                                                     | 45      |
| Rabbits like Carrots                                            | 49      |
| A Rose for Icy Heart                                            | 50      |
| Heavy Sword                                                     | 50      |
| Frogbike Magnet Hero                                            | 51      |
| Heroes of Sokoban II Monsters                                   | 51      |
| 12345 v1.0                                                      | 52      |
| Life is Hard                                                    | 52      |
| Bombs Away                                                      | 55      |
| Aaaah! I'm Being Attacked by a Giant Tentacle!                  | 55      |
| Illuminate                                                      | 56      |
| Puzzle Dash                                                     | 57      |
| IDOLS TO THE BURNT GOD                                          | 60      |
| Miss Direction                                                  | 63      |
| Weird Bug and the Many Magic Gems                               | 63      |
| Let me through                                                  | 64      |
| Candy Crush Demake                                              | 65      |
|                                                                 | 65      |
| Diagonal Block Pushing Prototype                                | 66      |
| Two-faced                                                       | 67      |
| Elimination                                                     | 69      |
| Drop Kick                                                       | 74      |
| Smoothoban                                                      | 78      |
| Heroes of Sokoban III The Bard and The Druid                    | 79      |
| heroes of sokoban 3                                             | 79      |
| Stackoban                                                       | 79      |

Continued on next page

Table 4: PuzzleScript games in which one or more levels were successfully validated in JAX (vis-a-vis solutions generated by breadth-first search in JavaScript).

| Game                                        | # Rules |
|---------------------------------------------|---------|
| SHELL CASE                                  | 80      |
| Feed Me Through A Straw                     | 82      |
| Instrumenta de Superi                       | 84      |
| Magnetoban                                  | 88      |
| Snakey Jakey                                | 93      |
| chaos wizard ii spellcrafter                | 104     |
| Broken Abacus                               | 115     |
| 123456                                      | 117     |
| Flower Bed                                  | 127     |
| ParaLands                                   | 131     |
| Infected World                              | 133     |
| Let's Part, E Contest Ver                   | 138     |
| Cooking Game                                | 140     |
| Wiggler demake                              | 147     |
| Kiri's Garden                               | 157     |
| Inswaption                                  | 157     |
| Alcazar                                     | 161     |
| STRATA-GEMS                                 | 201     |
| Fish Friend                                 | 209     |
| Aperture Science Sokoban Testing Initiative | 226     |
| Doors and Boxes                             | 279     |

Table 5: Results of BFS on full dataset of games, with max 100,000 max search iterations and a timeout of 1 minute.

| Game                                        | Solved Levels % | # Total Levels | Max Search Iterations |
|---------------------------------------------|-----------------|----------------|-----------------------|
| Wizard School!                              | 100%            | 1              | 0                     |
| Light Knight                                | 100%            | 1              | 0                     |
| Linked                                      | 100%            | 7              | 0                     |
| Not Normal Crates                           | 100%            | 18             | 0                     |
| A Cog's Life                                | 100%            | 3              | 0                     |
| the gods await me                           | 100%            | 1              | 1                     |
| IDIBAW                                      | 100%            | 15             | 3                     |
| XL-Up Maze                                  | 100%            | 2              | 4                     |
| FULL CIRCLE                                 | 100%            | 1              | 4                     |
| Elements                                    | 100%            | 11             | 5                     |
| the camel and th                            | 100%            | 1              | 5                     |
| Rock, Paper, Scissors<br>(v0.90 = v1.alpha) | 100%            | 13             | 5                     |
| Puzzlescript Diary                          | 100%            | 1              | 8                     |
| Find Girlfriend!                            | 100%            | 15             | 13                    |
| Dark Maze 3                                 | 100%            | 1              | 15                    |
| Rocketman                                   | 100%            | 5              | 16                    |
| 1D Sokoban                                  | 100%            | 2              | 19                    |
| Repel                                       | 100%            | 4              | 23                    |
| Wrap                                        | 100%            | 7              | 23                    |
| Hungry Kitty                                | 100%            | 10             | 26                    |
| nekopuzzle                                  | 100%            | 10             | 26                    |
| Slidyyyyyyy                                 | 100%            | 5              | 27                    |
| Mirror Bounce                               | 100%            | 4              | 34                    |
| Impetus                                     | 100%            | 5              | 37                    |
| Floor Painter                               | 100%            | 1              | 38                    |
| Slippy Penguin                              | 100%            | 7              | 39                    |
| Castle Monk                                 | 100%            | 2              | 44                    |
| Minimalist                                  | 100%            | 10             | 46                    |
| Silly Rabbit                                | 100%            | 4              | 48                    |
| Tumblebox                                   | 100%            | 4              | 51                    |
| GDD301 Game                                 | 100%            | 10             | 51                    |
| LameLightsOut                               | 100%            | 4              | 52                    |
| something                                   | 100%            | 1              | 60                    |
| Pilgrimage                                  | 100%            | 2              | 61                    |
| Pumpkin smasher                             | 100%            | 8              | 62                    |
| Yin and Yang                                | 100%            | 3              | 62                    |
| Four-room tilt mazes                        | 100%            | 3              | 63                    |
| How Many Digits Of Pi                       | 100%            | 21             | 65                    |
| Do You Know                                 | 100%            | 7              | 66                    |
| Rocketmen                                   | 100%            | 7              | 66                    |
| Roller Boi                                  | 100%            | 6              | 76                    |
| HyperMaze                                   | 100%            | 1              | 83                    |
| Fruit Ghost                                 | 100%            | 1              | 88                    |
| Forever Hallway                             | 100%            | 2              | 103                   |
| Rolling-block colour-<br>zone mazes         | 100%            | 9              | 117                   |
| STUCK IN A HOLE                             | 100%            | 17             | 121                   |
| Hysteresis mazes                            | 100%            | 5              | 168                   |
| Inchworm                                    | 100%            | 1              | 174                   |
| Tumblin'                                    | 100%            | 6              | 192                   |

Continued on next page

Table 5: Results of BFS on full dataset of games, with max 100,000 max search iterations and a timeout of 1 minute.

| Game                   | Solved Levels % | # Total Levels | Max Search Iterations |
|------------------------|-----------------|----------------|-----------------------|
| CC2                    | 100%            | 1              | 204                   |
| Random Color Maze      | 100%            | 8              | 217                   |
| Stick-with-it mazes    | 100%            | 5              | 220                   |
| Absorb                 | 100%            | 2              | 302                   |
| Game 101               | 100%            | 7              | 367                   |
| Puzzle Game Supreme    | 100%            | 4              | 384                   |
| With Cheese            | 100%            |                |                       |
| Memories Of Castle-    | 100%            | 10             | 396                   |
| mouse                  |                 |                |                       |
| castlemouse            | 100%            | 10             | 396                   |
| Animal Cascade         | 100%            | 10             | 396                   |
| Eyes On You            | 100%            | 2              | 442                   |
| COIN COLLECTORS        | 100%            | 10             | 452                   |
| Ouroboros              | 100%            | 6              | 478                   |
| Saute Mouton           | 100%            | 1              | 484                   |
| Roots                  | 100%            | 5              | 509                   |
| Boats Cars & Trains    | 100%            | 9              | 510                   |
| Impasse                | 100%            | 23             | 529                   |
| Drop Maze              | 100%            | 5              | 570                   |
| Space Shoot-em-puzzle  | 100%            | 10             | 592                   |
| Mimic Translation      | 100%            | 7              | 629                   |
| LA CASE DE CANIMI      | 100%            | 10             | 686                   |
| YE PAPEL               |                 |                |                       |
| Rewindoban             | 100%            | 5              | 812                   |
| Darkness Sokoban       | 100%            | 2              | 877                   |
| sokoban basic          | 100%            | 2              | 900                   |
| sokoban basic zoom-    | 100%            | 2              | 900                   |
| screen                 |                 |                |                       |
| sokoban sanity         | 100%            | 3              | 900                   |
| sokoban basic debug    | 100%            | 2              | 900                   |
| Stuffle                | 100%            | 2              | 900                   |
| RBG                    | 100%            | 1              | 930                   |
| Shield Game            | 100%            | 3              | 973                   |
| Kill the eyes          | 100%            | 1              | 974                   |
| Loup-Mouton-Chou       | 100%            | 1              | 1127                  |
| PWARE SKEG v1.1        | 100%            | 6              | 1256                  |
| Fishman                | 100%            | 4              | 1278                  |
| It Is Pitch Black      | 100%            | 5              | 1331                  |
| Brain                  | 100%            | 1              | 1353                  |
| Racist Dogs            | 100%            | 3              | 1355                  |
| Black & White          | 100%            | 3              | 1381                  |
| Blind Ninja            | 100%            | 9              | 1481                  |
| Piedra                 | 100%            | 4              | 1489                  |
| Towers of Hanoi        | 100%            | 4              | 1553                  |
| Metamorph              | 100%            | 4              | 1562                  |
| Crate Rotate           | 100%            | 11             | 1583                  |
| Path Finder            | 100%            | 1              | 1589                  |
| Detroit Become Im-     | 100%            | 1              | 1606                  |
| mense                  |                 |                |                       |
| Clean Up               | 100%            | 8              | 1667                  |
| Line of Sight          | 100%            | 1              | 1741                  |
| m c eschers armageddon | 100%            | 4              | 1921                  |

Continued on next page

Table 5: Results of BFS on full dataset of games, with max 100,000 max search iterations and a timeout of 1 minute.

| Game                            | Solved Levels % | # Total Levels | Max Search Iterations |
|---------------------------------|-----------------|----------------|-----------------------|
| MC Escher's Equestrian          | 100%            | 4              | 1921                  |
| Armageddon                      | 100%            | 5              | 2164                  |
| Deserted Island                 | 100%            | 1              | 2272                  |
| Ebony & Ivory                   | 100%            | 1              | 2272                  |
| ebony and ivory                 | 100%            | 26             | 2351                  |
| Slide Rule                      | 100%            | 3              | 2472                  |
| Veggie Jam                      | 100%            | 10             | 2779                  |
| byyourside                      | 100%            | 1              | 2909                  |
| Five Pulloban Puzzles           | 100%            | 1              | 3246                  |
| Hill Buddies                    | 100%            | 1              | 3407                  |
| Tricky Tower                    | 100%            | 6              | 3863                  |
| Game One                        | 100%            | 11             | 3882                  |
| Mad Queens                      | 100%            | 1              | 4417                  |
| Vines                           | 100%            | 1              | 4508                  |
| Shroom Party!                   | 100%            | 11             | 4606                  |
| TipOver                         | 100%            | 1              | 4771                  |
| Deltarune block pushing game    | 100%            | 6              | 4831                  |
| Magical Shoe Adventure          | 100%            | 6              | 4988                  |
| icecrates                       | 100%            | 6              | 4988                  |
| IceCrates                       | 100%            | 4              | 5013                  |
| CrateBlob                       | 100%            | 6              | 5063                  |
| Duplex                          | 100%            | 5              | 5296                  |
| Crate Game Five                 | 100%            | 9              | 5297                  |
| Sokoban...                      | 100%            | 4              | 5371                  |
| Modality                        | 100%            | 4              | 5371                  |
| modality                        | 100%            | 5              | 5587                  |
| Little Girl, Big World          | 100%            | 10             | 5712                  |
| naborciM                        | 100%            | 10             | 5712                  |
| Time-reversed Microban          | 100%            | 3              | 5786                  |
| SSR Demake                      | 100%            | 4              | 6426                  |
| Rob's first game                | 100%            | 2              | 6569                  |
| Connect Four                    | 100%            | 6              | 6710                  |
| Abel's Warehouse                | 100%            | 31             | 7101                  |
| Bubble Butler CMD RE-ORGANIZE   | 100%            | 7              | 7258                  |
| silver lungs                    | 100%            | 4              | 7571                  |
| magnetic                        | 100%            | 1              | 7671                  |
| Savior                          | 100%            | 8              | 7878                  |
| Switcheroo                      | 100%            | 5              | 7946                  |
| Cyberpunk 2020                  | 100%            | 4              | 8770                  |
| Laser                           | 100%            | 1              | 9063                  |
| Sponge Game                     | 100%            | 1              | 9382                  |
| A port of Puzzle Wizard         | 100%            | 1              | 10372                 |
| IQ 130+, level 18 of 72         | 100%            | 14             | 10670                 |
| Pac-Puzzler                     | 100%            | 2              | 11620                 |
| Strange Warehouse               | 100%            | 11             | 12189                 |
| sokoban match3                  | 100%            | 11             | 12189                 |
| slidings                        | 100%            | 23             | 12375                 |
| Slidings                        | 100%            |                |                       |
| Sokubunny and the colored Boxes | 100%            |                |                       |

Continued on next page



Table 5: Results of BFS on full dataset of games, with max 100,000 max search iterations and a timeout of 1 minute.

| Game                           | Solved Levels % | # Total Levels | Max Search Iterations |
|--------------------------------|-----------------|----------------|-----------------------|
| Pulling Box Sokoban            | 100%            | 10             | 12813                 |
| Stickyban                      | 100%            | 7              | 14038                 |
| The Observable Uni-verse       | 100%            | 7              | 14706                 |
| Multi-word Dictionary Game     | 100%            | 1              | 15875                 |
| wordgame                       | 100%            | 1              | 15875                 |
| octat                          | 100%            | 8              | 16009                 |
| Marble Shoot                   | 100%            | 11             | 16243                 |
| Michael Bay's Legend of Zelda  | 100%            | 3              | 16377                 |
| Stairways                      | 100%            | 3              | 16942                 |
| Line Force                     | 100%            | 1              | 17338                 |
| candy saga 2 turbo edge        | 100%            | 8              | 17544                 |
| Tele                           | 100%            | 7              | 17585                 |
| Coin Eater                     | 100%            | 7              | 17672                 |
| Spring                         | 100%            | 3              | 18160                 |
| RAFTURE 2 SALVATION            | 100%            | 9              | 21102                 |
| Shooting Pool                  | 100%            | 6              | 21536                 |
| Escape the Void Full           | 100%            | 17             | 21803                 |
| Not in the mood                | 100%            | 1              | 24884                 |
| Nom                            | 100%            | 1              | 28142                 |
| Back home                      | 100%            | 13             | 29166                 |
| Towerfall                      | 100%            | 1              | 29462                 |
| Dangerous Dungeon              | 100%            | 10             | 29769                 |
| lunar lockout                  | 100%            | 4              | 30351                 |
| Game Loading                   | 100%            | 3              | 30552                 |
| The McKelvey-Schofield Theorem | 100%            | 2              | 32827                 |
| Ocean Treasure                 | 100%            | 12             | 35663                 |
| Party Demon                    | 100%            | 3              | 36069                 |
| Kettle                         | 100%            | 11             | 36298                 |
| kettle                         | 100%            | 11             | 36298                 |
| Possibility Space              | 100%            | 3              | 38034                 |
| Spacekoban                     | 100%            | 20             | 38599                 |
| Sokoban Dungeon                | 100%            | 3              | 41174                 |
| Spider's Hollow                | 100%            | 11             | 44385                 |
| Glue Factory                   | 100%            | 4              | 45418                 |
| Sokobot                        | 100%            | 2              | 45673                 |
| Backstabber                    | 100%            | 6              | 48770                 |
| Bat Loves Lava Shark           | 100%            | 3              | 51127                 |
| Opposition                     | 100%            | 14             | 53575                 |
| No Right Turn Sokoban          | 100%            | 4              | 57140                 |
| ESCAPE!                        | 100%            | 5              | 58846                 |
| Graded Sir                     | 100%            | 5              | 59089                 |
| dreizack                       | 100%            | 2              | 63708                 |
| Bottomless puzzle-adventure    | 100%            | 2              | 64133                 |
| Time-Reversed Minicosmos       | 100%            | 40             | 65958                 |
| Parity Match                   | 100%            | 12             | 67572                 |
| Swap Sokoban                   | 100%            | 10             | 74488                 |

Continued on next page

Table 5: Results of BFS on full dataset of games, with max 100,000 max search iterations and a timeout of 1 minute.

| Game                               | Solved Levels % | # Total Levels | Max Search Iterations |
|------------------------------------|-----------------|----------------|-----------------------|
| The Dungeon of Squeamish Chickens  | 100%            | 12             | 76510                 |
| Son of Pacman                      | 100%            | 4              | 82138                 |
| Logger Isles                       | 100%            | 1              | 86503                 |
| Nirvana                            | 100%            | 4              | 91325                 |
| Zombie Pitfall                     | 100%            | 3              | 94736                 |
| Zombie Invasion                    | 100%            | 4              | 96570                 |
| Philosophy                         | 98%             | 113            | 100000                |
| Blind Maze a1                      | 96%             | 25             | 100000                |
| Pig Friends                        | 95%             | 20             | 8                     |
| Pivotal                            | 95%             | 20             | 100000                |
| Forest of Tizenhat                 | 94%             | 18             | 100000                |
| smother                            | 94%             | 16             | 100000                |
| Smother                            | 94%             | 16             | 100000                |
| The World Beneath the Surface      | 94%             | 16             | 100000                |
| Easy Enigma                        | 94%             | 16             | 100000                |
| AVGN Dis-Ventures                  | 93%             | 30             | 100000                |
| Power Block                        | 93%             | 15             | 100000                |
| Zanzlanz Adventures                | 93%             | 15             | 100000                |
| Fast Forward                       | 93%             | 15             | 100000                |
| sokobond demake                    | 93%             | 15             | 100000                |
| Velocity Castle                    | 93%             | 14             | 27266                 |
| Snow                               | 92%             | 13             | 100000                |
| Involuntary Line Force Plus        | 92%             | 13             | 100000                |
| sum three horizontally to 8!       | 92%             | 13             | 100000                |
| Travelling salesman                | 92%             | 12             | 100000                |
| pikkuruinen                        | 92%             | 12             | 100000                |
| Colour Chained                     | 92%             | 12             | 100000                |
| color chained                      | 92%             | 12             | 100000                |
| Unity                              | 92%             | 12             | 100000                |
| Take Heart Lass                    | 92%             | 12             | 100000                |
| take heart lass                    | 92%             | 12             | 100000                |
| Colorban                           | 91%             | 23             | 100000                |
| Drop Kick                          | 91%             | 34             | 100000                |
| coincounter                        | 91%             | 11             | 11042                 |
| Coin Counter                       | 91%             | 11             | 11042                 |
| Ball smashes blocks                | 91%             | 11             | 100000                |
| Labyrinth                          | 91%             | 11             | 100000                |
| rotate fall                        | 90%             | 20             | 184                   |
| Lime Richard                       | 90%             | 10             | 100000                |
| Sokoban Flipped                    | 90%             | 10             | 100000                |
| Heavy Sword                        | 90%             | 10             | 100000                |
| 12345 v1.0                         | 90%             | 30             | 100000                |
| MazezaM                            | 90%             | 30             | 100000                |
| mazezam                            | 90%             | 30             | 100000                |
| Algorithm-Generated Sokoban Levels | 90%             | 20             | 100000                |
| the undertaking                    | 89%             | 38             | 70                    |
| Escaping Limbo                     | 89%             | 9              | 10493                 |

Continued on next page

Table 5: Results of BFS on full dataset of games, with max 100,000 max search iterations and a timeout of 1 minute.

| Game                       | Solved Levels % | # Total Levels | Max Search Iterations |
|----------------------------|-----------------|----------------|-----------------------|
| lovendpieces               | 89%             | 9              | 36029                 |
| Love and Pieces            | 89%             | 9              | 36029                 |
| Pants, Shirt, Cap          | 89%             | 9              | 100000                |
| This Adventure World       | 89%             | 9              | 100000                |
| Pac-Slide V0.3             | 89%             | 9              | 100000                |
| Candy's Crushes Saga       | 88%             | 26             | 100000                |
| Beams and Flowers          | 88%             | 17             | 100000                |
| The Growth of H'Ragh       | 88%             | 8              | 2552                  |
| Coin Dropper               | 88%             | 24             | 100000                |
| Miner To Miner Empire      | 88%             | 8              | 100000                |
| Isle of Sokoban            | 88%             | 8              | 100000                |
| Soko-bine                  | 88%             | 8              | 100000                |
| Stealth Agent Gemini       | 87%             | 15             | 50846                 |
| Mice and Cheese            | 87%             | 15             | 100000                |
| Ice Cubes                  | 86%             | 29             | 100000                |
| Sweet Hints                | 86%             | 7              | 100000                |
| Mars Attacks               | 86%             | 7              | 100000                |
| push                       | 86%             | 21             | 100000                |
| PUSH                       | 86%             | 21             | 100000                |
| 3 brothers                 | 86%             | 14             | 100000                |
| EpicJamGame                | 86%             | 7              | 100000                |
| Stepping Stones            | 86%             | 7              | 100000                |
| Stairs                     | 86%             | 7              | 100000                |
| Miss Direction             | 85%             | 20             | 100000                |
| Angize                     | 85%             | 13             | 100000                |
| Dot Puzzle 3.1             | 84%             | 19             | 100000                |
| easyenigma                 | 84%             | 19             | 100000                |
| Schleimban                 | 83%             | 6              | 13478                 |
| Eschoban                   | 83%             | 6              | 24838                 |
| Party Leaver 0.02          | 83%             | 6              | 100000                |
| PackBot                    | 83%             | 12             | 100000                |
| Insey Winsey Spider        | 83%             | 6              | 100000                |
| Combine!                   | 83%             | 12             | 100000                |
| The electrician            | 83%             | 6              | 100000                |
| sokodig                    | 83%             | 18             | 100000                |
| Boupha's Candle Quest      | 83%             | 12             | 100000                |
| Prototype Demo v1          | 83%             | 6              | 100000                |
| Magnet Jack                | 83%             | 6              | 100000                |
| Manni the Mountaineer      | 83%             | 6              | 100000                |
| Closure Demake             | 83%             | 6              | 100000                |
| Jailbreak                  | 83%             | 6              | 100000                |
| Soliquid                   | 82%             | 11             | 100000                |
| Stand II                   | 82%             | 11             | 100000                |
| Star Burger Inc            | 81%             | 16             | 100000                |
| Doktor Lezer               | 81%             | 16             | 100000                |
| cakemonsters               | 81%             | 36             | 100000                |
| Lord of darkness           | 80%             | 10             | 1649                  |
| GDD301 Demo Game           | 80%             | 5              | 2971                  |
| Subterranean Maze of Caves | 80%             | 5              | 16476                 |
| Transparency               | 80%             | 10             | 100000                |

Continued on next page

Table 5: Results of BFS on full dataset of games, with max 100,000 max search iterations and a timeout of 1 minute.

| Game                                                     | Solved Levels % | # Total Levels | Max Search Iterations |
|----------------------------------------------------------|-----------------|----------------|-----------------------|
| Xtreme Gardening                                         | 80%             | 10             | 100000                |
| Palette                                                  | 80%             | 15             | 100000                |
| Misaligned                                               | 80%             | 10             | 100000                |
| Gravity Sokoban                                          | 80%             | 10             | 100000                |
| Routing Puzzle                                           | 80%             | 10             | 100000                |
| Aaaah! I'm Being At-<br>tacked by a Giant Tenta-<br>cle! | 80%             | 10             | 100000                |
| Hanoi Winter                                             | 80%             | 5              | 100000                |
| Stand III                                                | 80%             | 15             | 100000                |
| Stand                                                    | 80%             | 5              | 100000                |
| Color Combination                                        | 80%             | 5              | 100000                |
| The Blob                                                 | 80%             | 5              | 100000                |
| Castle Duck!                                             | 80%             | 5              | 100000                |
| Single Map Symbol Mi-<br>croban                          | 80%             | 10             | 100000                |
| ZigZag Ice                                               | 80%             | 5              | 100000                |
| Microban                                                 | 80%             | 10             | 100000                |
| microban                                                 | 80%             | 10             | 100000                |
| VEXT EDIT                                                | 80%             | 5              | 100000                |
| Rippler's Tower                                          | 80%             | 25             | 100000                |
| Union Move                                               | 79%             | 14             | 99590                 |
| High Noon RPG game                                       | 79%             | 14             | 100000                |
| Enqueue                                                  | 79%             | 14             | 100000                |
| Boxes                                                    | 78%             | 9              | 100000                |
| Unfinished Arrows                                        | 78%             | 9              | 100000                |
| Game Flood                                               | 78%             | 9              | 100000                |
| Lis' game development                                    | 78%             | 9              | 100000                |
| adventure                                                | 77%             | 13             | 100000                |
| Fabric                                                   | 77%             | 13             | 100000                |
| Summer                                                   | 76%             | 17             | 100000                |
| Puzzle Script Tutorial                                   | 76%             | 21             | 100000                |
| pusH                                                     | 75%             | 4              | 38                    |
| wall scout                                               | 75%             | 4              | 1060                  |
| PuzzleScript Cell Ma-<br>chine Test                      | 75%             | 4              | 100000                |
| Flying Kick                                              | 75%             | 16             | 100000                |
| Instrumenta de Superi                                    | 75%             | 8              | 100000                |
| L.A.S.E.R                                                | 75%             | 20             | 100000                |
| it dies in the light                                     | 75%             | 4              | 100000                |
| Memory path                                              | 75%             | 12             | 100000                |
| Janitor Ted                                              | 75%             | 12             | 100000                |
| Crafting Table                                           | 75%             | 4              | 100000                |
| Merge and Swap                                           | 75%             | 8              | 100000                |
| whaleworld                                               | 75%             | 8              | 100000                |
| TimeStopp                                                | 75%             | 8              | 100000                |
| Together Alone                                           | 75%             | 4              | 100000                |
| Box Fill                                                 | 75%             | 8              | 100000                |
| It Dies In The Light                                     | 75%             | 4              | 100000                |
| Jesus Respawns                                           | 75%             | 12             | 100000                |
| You're Toast!                                            | 75%             | 4              | 100000                |

Continued on next page

Table 5: Results of BFS on full dataset of games, with max 100,000 max search iterations and a timeout of 1 minute.

| Game                                        | Solved Levels % | # Total Levels | Max Search Iterations |
|---------------------------------------------|-----------------|----------------|-----------------------|
| 2D Whale World                              | 75%             | 8              | 100000                |
| Skull Contraption                           | 75%             | 4              | 100000                |
| diesinthelight                              | 75%             | 4              | 100000                |
| Tile Tiler                                  | 75%             | 4              | 100000                |
| Hey you! Stop blocking the laser!           | 74%             | 23             | 100000                |
| Unconventional Guns                         | 73%             | 15             | 100000                |
| Manic Ammo                                  | 73%             | 15             | 100000                |
| manic ammo                                  | 73%             | 15             | 100000                |
| Color Fill Land                             | 73%             | 11             | 7702                  |
| Dinosaur Love Story                         | 73%             | 22             | 100000                |
| Don't Play On the Ice                       | 73%             | 11             | 100000                |
| constellationz                              | 73%             | 11             | 100000                |
| Heroes of Sokoban and Other Tales The Rogue | 72%             | 18             | 100000                |
| Warping Through the Halls                   | 71%             | 7              | 10486                 |
| Two-Bit's Sacraficial Adventure             | 71%             | 14             | 100000                |
| where did all this ice come from            | 71%             | 14             | 100000                |
| Sokofun Clone                               | 71%             | 7              | 100000                |
| Train                                       | 71%             | 7              | 100000                |
| Let me through                              | 71%             | 7              | 100000                |
| Yin Yang                                    | 71%             | 14             | 100000                |
| Alley                                       | 71%             | 7              | 100000                |
| Rook Game                                   | 71%             | 7              | 100000                |
| BulletDodger                                | 71%             | 24             | 100000                |
| Stackoban                                   | 70%             | 30             | 100000                |
| Rainbow Apples                              | 70%             | 10             | 100000                |
| zelda fan game                              | 70%             | 10             | 100000                |
| Neutralize                                  | 70%             | 10             | 100000                |
| Touchdown Heroes (Prototype)                | 70%             | 10             | 100000                |
| I'm Sick Today                              | 69%             | 13             | 100000                |
| One Way Street                              | 67%             | 3              | 100000                |
| Goblin Hooblob                              | 67%             | 6              | 100000                |
| Mitosys                                     | 67%             | 15             | 100000                |
| Clean your room                             | 67%             | 12             | 100000                |
| Reap                                        | 67%             | 6              | 100000                |
| Knightoban                                  | 67%             | 6              | 100000                |
| Cold Feet Sokoban                           | 67%             | 3              | 100000                |
| Infected World                              | 67%             | 21             | 100000                |
| Cave Story Demake v2.3                      | 67%             | 3              | 100000                |
| Delicious Ships!                            | 67%             | 15             | 100000                |
| Don't Die                                   | 67%             | 6              | 100000                |
| Heroes of Sokoban - Ancient Japan           | 67%             | 6              | 100000                |
| Remote Control                              | 67%             | 3              | 100000                |
| Sokoban                                     | 67%             | 9              | 100000                |
| Pink Matter                                 | 67%             | 9              | 100000                |

Continued on next page

Table 5: Results of BFS on full dataset of games, with max 100,000 max search iterations and a timeout of 1 minute.

| Game                                                  | Solved Levels % | # Total Levels | Max Search Iterations |
|-------------------------------------------------------|-----------------|----------------|-----------------------|
| Indiana Jones And His Adventure In The Lost Temple... | 67%             | 3              | 100000                |
| Add Man 2 This Time                                   | 67%             | 15             | 100000                |
| It's Arithmetical                                     | 67%             | 12             | 100000                |
| Dotsnake                                              | 67%             | 3              | 100000                |
| Escape The Haunted Mansion                            | 67%             | 3              | 100000                |
| Collapsable Sokoban                                   | 67%             | 12             | 100000                |
| Lieutenant Americium                                  | 67%             | 3              | 100000                |
| Oxygen Not Required                                   | 67%             | 6              | 100000                |
| Teh Interwebs                                         | 67%             | 6              | 100000                |
| Gingham                                               | 67%             | 3              | 100000                |
| Electric Slide                                        | 67%             | 3              | 100000                |
| Weird Dave                                            | 67%             | 9              | 100000                |
| Broken Leg Sokoban                                    | 67%             | 101            | 100000                |
| Catrap                                                | 66%             | 20             | 100000                |
| Winter                                                | 65%             | 17             | 100000                |
| Bricks and Hammer                                     | 65%             | 14             | 100000                |
| Candy Bomb                                            | 64%             | 14             | 100000                |
| Wiggler demake                                        | 64%             | 14             | 100000                |
| Sticky v0.901                                         | 64%             | 11             | 100000                |
| Fractured Identity                                    | 64%             | 22             | 100000                |
| heroes of sokoban                                     | 64%             | 22             | 100000                |
| Heroes of Sokoban                                     | 64%             | 19             | 100000                |
| Hi, Vmind!                                            | 63%             | 8              | 100000                |
| Microbe Destroyers                                    | 62%             | 32             | 100000                |
| Snakey Jakey                                          | 62%             | 8              | 100000                |
| Dead Grass                                            | 62%             | 8              | 100000                |
| VRPS                                                  | 62%             | 49             | 100000                |
| Sluzzle                                               | 61%             | 5              | 16651                 |
| shoving                                               | 60%             | 10             | 100000                |
| GDD301 Lab 010                                        | 60%             | 5              | 100000                |
| The Trouble with Toasters                             | 60%             | 10             | 100000                |
| Al's Egg Roll                                         | 60%             | 20             | 100000                |
| Autumn                                                | 60%             | 5              | 100000                |
| blockfaker                                            | 60%             | 5              | 100000                |
| Poop and Salad Have Different Mindsets                | 60%             | 5              | 100000                |
| The Nuevo Asylum                                      | 60%             | 10             | 100000                |
| Tractor Beam Sokoban9                                 | 60%             | 10             | 100000                |
| Ultimate Sokoban                                      | 60%             | 5              | 100000                |
| Supreme                                               | 60%             | 5              | 100000                |
| Kicking walls                                         | 60%             | 5              | 100000                |
| BUDS                                                  | 60%             | 5              | 100000                |
| 2020                                                  | 60%             | 10             | 100000                |
| Doors and Boxes                                       | 60%             | 5              | 100000                |
| Dating Queens                                         | 60%             | 5              | 100000                |
| Mini Nomerads 2 Constructaballs                       | 60%             | 10             | 100000                |
| Candy Crush Demake                                    | 60%             |                |                       |

Continued on next page

Table 5: Results of BFS on full dataset of games, with max 100,000 max search iterations and a timeout of 1 minute.

| Game                                         | Solved Levels % | # Total Levels | Max Search Iterations |
|----------------------------------------------|-----------------|----------------|-----------------------|
| Clones                                       | 60%             | 10             | 100000                |
| Heroes of Sokoban and Other Tales The Ranger | 59%             | 22             | 100000                |
| Magnetron                                    | 59%             | 22             | 100000                |
| Cyberbox                                     | 59%             | 17             | 100000                |
| Ice and Tar                                  | 58%             | 12             | 100000                |
| Atlas Shrank                                 | 58%             | 12             | 100000                |
| The Explorer 3.0                             | 58%             | 12             | 100000                |
| atlas shrank                                 | 58%             | 12             | 100000                |
|                                              | 58%             | 19             | 100000                |
| Omniban                                      | 58%             | 19             | 100000                |
| Bubblegoban                                  | 57%             | 7              | 768                   |
| Bridge-toggle Maze                           | 57%             | 7              | 100000                |
| Yin-Yang                                     | 57%             | 21             | 100000                |
| Push - A - Crate                             | 57%             | 14             | 100000                |
| Hazard Golf                                  | 57%             | 7              | 100000                |
| Mini Nomerads                                | 56%             | 9              | 100000                |
| Santa's Great Escape                         | 56%             | 9              | 100000                |
| Two-faced                                    | 56%             | 9              | 100000                |
| Snek                                         | 56%             | 9              | 100000                |
| heroes of sokoban 2                          | 55%             | 22             | 100000                |
| Everything Antimatters                       | 55%             | 11             | 100000                |
| Sokocross                                    | 55%             | 22             | 100000                |
| A Knight's Tour                              | 55%             | 11             | 100000                |
| Heroes of Sokoban II                         | 55%             | 22             | 100000                |
| Monsters                                     |                 |                |                       |
| There is no-one here to help you             | 55%             | 11             | 100000                |
| A Rose for Icy Heart                         | 55%             | 11             | 100000                |
| 123456                                       | 54%             | 28             | 100000                |
| Brotherhood                                  | 53%             | 15             | 100000                |
| Inswaption                                   | 52%             | 21             | 100000                |
| Pitman MZ-700                                | 52%             | 50             | 100000                |
| sokoban horizontal                           | 50%             | 2              | 315                   |
| gdd301 test                                  | 50%             | 2              | 613                   |
| sokoban sticky                               | 50%             | 2              | 13082                 |
| lava flow                                    | 50%             | 2              | 44619                 |
| Undertale X O Puzzle                         | 50%             | 2              | 100000                |
| niggle                                       | 50%             | 4              | 100000                |
| Lights Out                                   | 50%             | 10             | 100000                |
| Shared Bridges Game                          | 50%             | 8              | 100000                |
| Hack It!                                     | 50%             | 2              | 100000                |
| 1D Rubik's Cube                              | 50%             | 2              | 100000                |
| Beam Islands                                 | 50%             | 8              | 100000                |
| Pushller                                     | 50%             | 4              | 100000                |
| Collapse                                     | 50%             | 2              | 100000                |
| collapse                                     | 50%             | 2              | 100000                |
| Flipush An Exciting Square Game              | 50%             | 6              | 100000                |
| Every Three Steps                            |                 |                |                       |
| You Hit a Wall Out of Nowhere                | 50%             | 2              | 100000                |

Continued on next page

Table 5: Results of BFS on full dataset of games, with max 100,000 max search iterations and a timeout of 1 minute.

| Game                                          | Solved Levels % | # Total Levels | Max Search Iterations |
|-----------------------------------------------|-----------------|----------------|-----------------------|
| Snakeoban                                     | 50%             | 10             | 100000                |
| A Knight's Path                               | 50%             | 2              | 100000                |
| Antimatter Labs                               | 50%             | 12             | 100000                |
| Ball Bros                                     | 50%             | 10             | 100000                |
| Twinkle, Twinkle Little Square                | 50%             | 8              | 100000                |
| Out There                                     | 50%             | 8              | 100000                |
| Directioban                                   | 50%             | 6              | 100000                |
| Match Pub                                     | 50%             | 10             | 100000                |
| Cancel                                        | 50%             | 8              | 100000                |
| Footprint Puzzle                              | 50%             | 4              | 100000                |
| Suplexer                                      | 50%             | 4              | 100000                |
| Maze it all                                   | 50%             | 4              | 100000                |
| SHELL CASE                                    | 50%             | 6              | 100000                |
| Switchboard Operator                          | 50%             | 6              | 100000                |
| Strong Fish                                   | 50%             | 18             | 100000                |
| FROWN INVERSION SQUAD                         | 50%             | 20             | 100000                |
| Juxtaposition                                 | 50%             | 16             | 100000                |
| SHY SNAKE                                     | 50%             | 2              | 100000                |
| Festive Lights                                | 50%             | 10             | 100000                |
| Stand Off                                     | 50%             | 10             | 100000                |
| Bridge                                        | 50%             | 4              | 100000                |
| Multiply                                      | 50%             | 6              | 100000                |
| Kick the Can                                  | 50%             | 4              | 100000                |
| Frogbike Magnet Hero                          | 50%             | 2              | 100000                |
| Hamiltwo                                      | 50%             | 2              | 100000                |
| The Circulatory System                        | 50%             | 24             | 100000                |
| Global Office - CSGO Emerita                  | 50%             | 16             | 100000                |
| Brendan loves mondays                         | 50%             | 10             | 100000                |
| Flower Bed                                    | 47%             | 17             | 100000                |
| Sokobaiogenesis                               | 46%             | 13             | 100000                |
| Illuminate                                    | 45%             | 31             | 100000                |
| Microban I                                    | 45%             | 155            | 100000                |
| Baguettes                                     | 44%             | 9              | 100000                |
| Filler                                        | 44%             | 18             | 100000                |
| Pontoluvian Straight-Jacket Puzzle Variations | 44%             | 9              | 100000                |
| Hero                                          | 44%             | 25             | 100000                |
| Bit Blocks                                    | 43%             | 58             | 100000                |
| Cops N Robbers                                | 43%             | 7              | 100000                |
| Match Flow                                    | 43%             | 14             | 100000                |
| Dreaming of Strawberries                      | 43%             | 7              | 100000                |
| Omnipresent                                   | 43%             | 7              | 100000                |
| Crates and Portals                            | 41%             | 29             | 100000                |
| cratopia                                      | 41%             | 17             | 100000                |
| Cratopia                                      | 41%             | 17             | 100000                |
| Zombie Rescue                                 | 40%             | 15             | 10905                 |
| Sokolor EX                                    | 40%             | 5              | 100000                |

Continued on next page



Table 5: Results of BFS on full dataset of games, with max 100,000 max search iterations and a timeout of 1 minute.

| Game                     | Solved Levels % | # Total Levels | Max Search Iterations |
|--------------------------|-----------------|----------------|-----------------------|
| Simple Block Plagarism   | 40%             | 5              | 100000                |
| Game                     |                 |                |                       |
| Circuit Breaker          | 40%             | 5              | 100000                |
| Dragon Quest             | 40%             | 10             | 100000                |
| I Only Play REAL Multi-  | 40%             | 5              | 100000                |
| ban                      |                 |                |                       |
| I Have No Mouth, And     |                 |                |                       |
| I Must Find My Hiding    | 40%             | 20             | 100000                |
| Spot                     |                 |                |                       |
| Heroes of sokoban        | 40%             | 25             | 100000                |
| edited                   |                 |                |                       |
| Grandma's Christmas      | 40%             | 10             | 100000                |
| Kisses                   |                 |                |                       |
| Monster block push       | 40%             | 10             | 100000                |
| game                     |                 |                |                       |
| Swap the block!          | 40%             | 5              | 100000                |
| Drop Swap                | 40%             | 5              | 100000                |
| Keys and Doors 0.1.0     | 40%             | 5              | 100000                |
| Explod                   | 40%             | 10             | 100000                |
| midas                    | 40%             | 15             | 100000                |
| Midas                    | 40%             | 15             | 100000                |
| the walls are closing in | 40%             | 10             | 100000                |
| on me                    |                 |                |                       |
| Alcazar                  | 40%             | 10             | 100000                |
| I Have No Mouth, And I   |                 |                |                       |
| Must Toggle Blocks On    | 40%             | 10             | 100000                |
| All ...                  |                 |                |                       |
| Puzzleboi                | 40%             | 5              | 100000                |
| The Adventures of Pablo  |                 |                |                       |
| Diego Jose Francisco de  | 39%             | 18             | 100000                |
| Pa...                    |                 |                |                       |
| Godzilla                 | 38%             | 8              | 100000                |
| Atomix demake            | 38%             | 8              | 100000                |
| Broken Abacus            | 38%             | 16             | 100000                |
| -ooo-                    | 38%             | 8              | 100000                |
| The Great Emu War        | 38%             | 24             | 100000                |
| NAND Circuit Simulator   | 38%             | 8              | 100000                |
| Number Friends -work     | 37%             | 27             | 100000                |
| in progress-             |                 |                |                       |
| the saga of the candy    | 37%             | 30             | 100000                |
| scroll                   |                 |                |                       |
| The Saga of the Candy    | 37%             | 30             | 100000                |
| Scroll                   |                 |                |                       |
| Reset                    | 36%             | 11             | 245                   |
| The Workshop             | 36%             | 11             | 100000                |
| PUZZLETALE               | 36%             | 11             | 100000                |
| heroes of sokoban 3      | 36%             | 22             | 100000                |
| Heroes of Sokoban III    | 36%             | 22             | 100000                |
| The Bard and The Druid   |                 |                |                       |
| Newton's Crates          | 36%             | 14             | 100000                |
| Medusa's Wrath v0.2.1    | 36%             | 14             | 100000                |
| Miner Guy                | 33%             | 3              | 100000                |
| Pipe Game                | 33%             | 3              | 100000                |
| Four Colour Theorem      | 33%             | 3              | 100000                |

Continued on next page

Table 5: Results of BFS on full dataset of games, with max 100,000 max search iterations and a timeout of 1 minute.

| Game                      | Solved Levels % | # Total Levels | Max Search Iterations |
|---------------------------|-----------------|----------------|-----------------------|
| Feed Me Through A Straw   | 33%             | 27             | 100000                |
| Ouzo Pixel Party          | 33%             | 9              | 100000                |
| Bad Example               | 33%             | 3              | 100000                |
| GASP                      | 33%             | 3              | 100000                |
| Knight's Tour             | 33%             | 6              | 100000                |
| sokochrome                | 33%             | 9              | 100000                |
| Pousser des caisses       | 33%             | 3              | 100000                |
| Memory Push               | 33%             | 9              | 100000                |
| Circulando                | 33%             | 3              | 100000                |
| Dinosaur Love Story       | 33%             | 6              | 100000                |
| Bonus Levels              |                 |                |                       |
| Life at Home Depot        | 33%             | 9              | 100000                |
| Diagonal Block Pushing    | 33%             | 3              | 100000                |
| Prototype                 |                 |                |                       |
| Straighten Up             | 33%             | 6              | 100000                |
| Season Finale             | 33%             | 9              | 100000                |
| Tidy the Cafe!            | 33%             | 6              | 100000                |
| At Last, A Ninja!         | 33%             | 3              | 100000                |
| Tornado Tamer             | 33%             | 6              | 100000                |
| Power Problems            | 31%             | 16             | 100000                |
| limerick                  | 30%             | 10             | 100000                |
| Let's Part, E Contest Ver | 30%             | 10             | 100000                |
| The Adventures of Red     |                 |                |                       |
| and Blue!                 | 30%             | 10             | 100000                |
| Aerobatics                | 30%             | 10             | 100000                |
| Gobble Rush!              | 29%             | 21             | 464                   |
| gobble rush               | 29%             | 21             | 464                   |
| ParaLands                 | 29%             | 7              | 100000                |
| Muddy Sokoban Level       |                 |                |                       |
| Set I                     | 29%             | 7              | 100000                |
| KidsCoding                | 29%             | 7              | 100000                |
| Diamond Mine              | 29%             | 7              | 100000                |
| Sokoslam                  | 28%             | 18             | 100000                |
| Boulder Puzzle            | 28%             | 18             | 100000                |
| Sticky Cubes              | 27%             | 11             | 100000                |
| Lime Rick                 | 27%             | 11             | 100000                |
| IDOLS TO THE              | 27%             | 26             | 100000                |
| BURNT GOD                 |                 |                |                       |
| EntrepotPhage Demake      | 27%             | 30             | 100000                |
| STRATA-GEMS               | 27%             | 30             | 100000                |
| Mow Problems              | 27%             | 15             | 100000                |
| Nethack Sokoban           | 26%             | 19             | 100000                |
| Stained Glass             | 25%             | 4              | 100000                |
| dungeon janitor           | 25%             | 4              | 100000                |
| Bichrome                  | 25%             | 12             | 100000                |
| ScriptCross               | 25%             | 4              | 100000                |
| scriptcross               | 25%             | 4              | 100000                |
| i am two                  | 25%             | 8              | 100000                |
| TwinPush                  | 25%             | 4              | 100000                |
| Akari 2                   | 25%             | 4              | 100000                |
| N Queens Puzzle           | 25%             | 8              | 100000                |

Continued on next page

Table 5: Results of BFS on full dataset of games, with max 100,000 max search iterations and a timeout of 1 minute.

| Game                      | Solved Levels % | # Total Levels | Max Search Iterations |
|---------------------------|-----------------|----------------|-----------------------|
| Dungeon Janitor           | 25%             | 4              | 100000                |
| Towers of Saigon          | 25%             | 48             | 100000                |
| Elementals                | 25%             | 4              | 100000                |
| Space Expedition          | 25%             | 8              | 100000                |
| Ice Maze                  | 25%             | 4              | 100000                |
| Darn gifs for my game     | 25%             | 4              | 100000                |
| Magnetoban                | 25%             | 12             | 100000                |
| Elimination               | 25%             | 20             | 100000                |
| The Land Of Secrets       | 25%             | 4              | 100000                |
| XL-Plan                   | 25%             | 4              | 100000                |
| The Dragon's Gold         | 25%             | 12             | 100000                |
| Aperture Science          |                 |                |                       |
| Sokoban Testing Initia-   | 24%             | 17             | 100000                |
| tive                      |                 |                |                       |
| Tour de Four              | 23%             | 13             | 100000                |
| FACED                     | 23%             | 26             | 100000                |
| Fox Cave v0.32 (this ver- | 22%             | 9              | 100000                |
| sion added Demon)         |                 |                |                       |
| Smoothoban                | 22%             | 45             | 100000                |
| Collect Gnocchi           | 21%             | 19             | 100000                |
| The Adventure of Puz-     | 20%             | 5              | 100000                |
| zler                      |                 |                |                       |
| Pornography for Begin-    | 20%             | 5              | 100000                |
| ners                      |                 |                |                       |
| Stage Floor Assembler     | 20%             | 15             | 100000                |
| Pegs                      | 20%             | 15             | 100000                |
| Surround Yourself With    | 20%             | 5              | 100000                |
| Dogs                      |                 |                |                       |
| The Irrigation Game       | 20%             | 10             | 100000                |
| Robot Repairs 1.2         | 20%             | 20             | 100000                |
| ESL Puzzle Game -         | 20%             | 10             | 100000                |
| CHALLENGE MODE            |                 |                |                       |
| Slime Squisher            | 19%             | 16             | 100000                |
| Boxes & Balloons          | 18%             | 22             | 100000                |
| Okosban                   | 18%             | 11             | 100000                |
| atlas shrank test         | 17%             | 12             | 211                   |
| Flippin' Ladybug          | 17%             | 6              | 100000                |
| Crocodiles Love Cook-     | 17%             | 12             | 100000                |
| ies                       |                 |                |                       |
| Sheep                     | 17%             | 12             | 100000                |
| The Beginning, The End    | 17%             | 12             | 100000                |
| SwapBot                   | 17%             | 12             | 100000                |
| -=lost=-                  | 17%             | 6              | 100000                |
| Nyetris DEMOv1.8          | 17%             | 12             | 100000                |
| Fish Friend               | 16%             | 25             | 98211                 |
| Leo                       | 15%             | 13             | 100000                |
| Some lines were meant     | 14%             | 7              | 100000                |
| to be crossed             |                 |                |                       |
| IMS445 Puzzlescript       | 14%             | 7              | 100000                |
| Game Buoy Deploy          | 14%             | 7              | 100000                |
| Cooking Game              | 14%             | 7              | 100000                |
| Fall Leaves               | 14%             | 7              | 100000                |
| Fallow Land               | 14%             | 14             | 100000                |

Continued on next page

Table 5: Results of BFS on full dataset of games, with max 100,000 max search iterations and a timeout of 1 minute.

| Game                             | Solved Levels % | # Total Levels | Max Search Iterations |
|----------------------------------|-----------------|----------------|-----------------------|
| Repeater                         | 14%             | 7              | 100000                |
| Turn-based Pac-man               | 12%             | 8              | 100000                |
| Telefrag                         | 12%             | 8              | 100000                |
| Solitaire                        | 12%             | 8              | 100000                |
| PrograMaze                       | 12%             | 8              | 100000                |
| Hector                           | 11%             | 9              | 100000                |
| Color Totems                     | 11%             | 18             | 100000                |
| Boolean Bloom 0.37               | 11%             | 9              | 100000                |
| stick candy puzzle saga          | 10%             | 20             | 100000                |
| JAM3 Game                        | 10%             | 10             | 100000                |
| Upstairs Downstairs              | 10%             | 20             | 100000                |
| Greedy Explorer                  | 10%             | 10             | 100000                |
| Gloves and Boots                 | 9%              | 11             | 100000                |
| Snake Crate                      | 9%              | 11             | 100000                |
| Do You Want to Build a Snowman   | 8%              | 12             | 100000                |
| Hitori                           | 7%              | 15             | 100000                |
| Weird Bug and the Many           | 6%              | 17             | 100000                |
| Magic Gems                       |                 |                |                       |
| Rabbits like Carrots             | 5%              | 20             | 100000                |
| chaos wizard                     | 5%              | 22             | 100000                |
| Puzzle Snake                     | 0%              | 1              | 1                     |
| Pushing It                       | 0%              | 1              | 1                     |
| Impostor crated!                 | 0%              | 1              | 1                     |
| againexample                     | 0%              | 1              | 2                     |
| Metal and Grass                  | 0%              | 8              | 4                     |
| Runner 2                         | 0%              | 1              | 6                     |
| Crypt of the Necro-dancer DEMAKE | 0%              | 1              | 6                     |
| Gamlet v16.09.04 Alpha           | 0%              | 5              | 6                     |
| Channel                          | 0%              | 1              | 11                    |
| Scale the Tower                  | 0%              | 1              | 12                    |
| sokoban empty                    | 0%              | 2              | 16                    |
| test                             | 0%              | 1              | 24                    |
| wrappingrecipe                   | 0%              | 1              | 25                    |
| opposition test                  | 0%              | 1              | 32                    |
| secrets test                     | 0%              | 1              | 32                    |
| soko and the band test           | 0%              | 1              | 48                    |
| colorban test                    | 0%              | 1              | 51                    |
| Helping                          | 0%              | 4              | 56                    |
| sumo                             | 0%              | 1              | 60                    |
| Picky Leaks                      | 0%              | 15             | 72                    |
| blank                            | 0%              | 2              | 81                    |
| Dungeon Walk II                  | 0%              | 1              | 120                   |
| Stephen's Delight                |                 |                |                       |
| Tic-Fa-No                        | 0%              | 1              | 121                   |
| rigid 11                         | 0%              | 1              | 127                   |
| Pong                             | 0%              | 1              | 169                   |
| Switch It Up                     | 0%              | 1              | 246                   |
| Jump Fox                         | 0%              | 1              | 303                   |
| Carnival Shooter!                | 0%              | 1              | 392                   |

Continued on next page

Table 5: Results of BFS on full dataset of games, with max 100,000 max search iterations and a timeout of 1 minute.

| Game                                       | Solved Levels % | # Total Levels | Max Search Iterations |
|--------------------------------------------|-----------------|----------------|-----------------------|
| Carnival Shooter                           | 0%              | 1              | 392                   |
| sokoban eyeball                            | 0%              | 1              | 506                   |
| eyeball                                    | 0%              | 1              | 506                   |
| rigidfail1                                 | 0%              | 1              | 670                   |
| Sleeping Bear                              | 0%              | 1              | 770                   |
| leftrighnps                                | 0%              | 1              | 888                   |
| Depth-First Maze                           | 0%              | 1              | 996                   |
| Soko and the Band                          | 0%              | 1              | 1096                  |
| naughtysprite                              | 0%              | 1              | 1190                  |
| Zaap                                       | 0%              | 1              | 1280                  |
| Getting ready for bed.                     | 0%              | 1              | 1688                  |
| perpendicular test                         | 0%              | 1              | 3906                  |
| Color Slider                               | 0%              | 5              | 5723                  |
| mazetest                                   | 0%              | 1              | 6001                  |
| octat test                                 | 0%              | 1              | 10040                 |
| limerick test                              | 0%              | 1              | 14268                 |
| Uphill Pathfinder                          | 0%              | 1              | 15578                 |
| Stand aside, everyone! I take large steps! | 0%              | 1              | 38377                 |
| Wormy                                      | 0%              | 1              | 59979                 |
| Puzzle Dash                                | 0%              | 5              | 100000                |
| Dungeon Generator V - Key Hunt edition     | 0%              | 1              | 100000                |
| Paul Bunyan's Demade Island Adventure (v2) | 0%              | 1              | 100000                |
| Bombs Away                                 | 0%              | 1              | 100000                |
| Quantum Childminding - Expanded Levelset   | 0%              | 8              | 100000                |
| tiny treasure hunt 1.1                     | 0%              | 7              | 100000                |
| Trains Love Snowmen                        | 0%              | 1              | 100000                |
| Life is Hard                               | 0%              | 1              | 100000                |
| threes                                     | 0%              | 1              | 100000                |
| Blow the ship down!                        | 0%              | 1              | 100000                |
| Dharma Dojo demake                         | 0%              | 5              | 100000                |
| Painter                                    | 0%              | 1              | 100000                |
| RED GREEN BLUE                             | 0%              | 2              | 100000                |
| Noleap                                     | 0%              | 1              | 100000                |
| Cuddlefish                                 | 0%              | 1              | 100000                |
| Amy                                        | 0%              | 8              | 100000                |
| Brush Runner                               | 0%              | 1              | 100000                |
| randomrobots                               | 0%              | 1              | 100000                |
| Treasure Hunt                              | 0%              | 2              | 100000                |
| Turing Machine                             | 0%              | 1              | 100000                |
| spooki                                     | 0%              | 1              | 100000                |
| Freeform Bal Ru's Curse                    | 0%              | 1              | 100000                |
| Sokoboros                                  | 0%              | 1              | 100000                |
| 9x9 Go                                     | 0%              | 1              | 100000                |
| Knighted chtp 2                            | 0%              | 1              | 100000                |
| tunnel rat                                 | 0%              | 2              | 100000                |
| Colors                                     | 0%              | 1              | 100000                |

Continued on next page

Table 5: Results of BFS on full dataset of games, with max 100,000 max search iterations and a timeout of 1 minute.

| Game                               | Solved Levels % | # Total Levels | Max Search Iterations |
|------------------------------------|-----------------|----------------|-----------------------|
| A desecration of Jack              | 0%              | 1              | 100000                |
| Lance's I'm too far gone           | 0%              | 1              | 100000                |
| Sixty-Five                         | 0%              | 1              | 100000                |
| Pushcat Jr                         | 0%              | 8              | 100000                |
| Ogres Are Like Onions              | 0%              | 1              | 100000                |
| ironic game                        | 0%              | 1              | 100000                |
| mijn puzzelspel                    | 0%              | 3              | 100000                |
| 3 in a row                         | 0%              | 1              | 100000                |
| Boulderban                         | 0%              | 2              | 100000                |
| rigid many many2                   | 0%              | 1              | 100000                |
| rigid many broken                  | 0%              | 2              | 100000                |
| Bal Ru's Curse cruelty-free demake | 0%              | 1              | 100000                |
| Roze                               | 0%              | 1              | 100000                |
| pretender to the crown             | 0%              | 16             | 100000                |
| tiny treasure hunt                 | 0%              | 1              | 100000                |
| rigid scott1                       | 0%              | 1              | 100000                |
| firefighting                       | 0%              | 1              | 100000                |
| riverpuzzle                        | 0%              | 1              | 100000                |
| Pipe Navigation                    | 0%              | 1              | 100000                |
| Last day of the year               | 0%              | 1              | 100000                |
| Quantum Childminding               | 0%              | 4              | 100000                |
| Club Penguin                       | 0%              | 1              | 100000                |
| Deadly Cat Maze                    | 0%              | 1              | 100000                |
| Princess of Isometria v0.10        | 0%              | 8              | 100000                |
| Overreaction                       | 0%              | 1              | 100000                |
| Minecraft                          | 0%              | 1              | 100000                |
| Zoop Demake                        | 0%              | 1              | 100000                |
| castlecloset                       | 0%              | 1              | 100000                |
| Harvesting Apples II               | 0%              | 1              | 100000                |
| Touhouban - Beta                   | 0%              | 6              | 100000                |
| Snowman Decorator                  | 0%              | 1              | 100000                |
| Little Glube                       | 0%              | 1              | 100000                |
| Gears                              | 0%              | 1              | 100000                |
| Bug Exterminator                   | 0%              | 5              | 100000                |
| Fi & BOXES!!!                      | 0%              | 1              | 100000                |
| zokoban                            | 0%              | 1              | 100000                |
| I'm too far gone                   | 0%              | 1              | 100000                |
| Impossible Sokoban                 | 0%              | 1              | 100000                |
| Lufia Puzzle Remake                | 0%              | 1              | 100000                |
| Tiny Farm 0.1                      | 0%              | 3              | 100000                |
| Paint                              | 0%              | 6              | 100000                |
| Little Dungeons                    | 0%              | 6              | 100000                |
| Tempting Fate                      | 0%              | 1              | 100000                |
| Shoop                              | 0%              | 1              | 100000                |
| Skeleton Assembler                 | 0%              | 1              | 100000                |
| Cave Explorer                      | 0%              | 1              | 100000                |
| Cannon Fodder                      | 0%              | 1              | 100000                |
| Snake Scout                        | 0%              | 1              | 100000                |
| King of walls                      | 0%              | 1              | 100000                |

Continued on next page

Table 5: Results of BFS on full dataset of games, with max 100,000 max search iterations and a timeout of 1 minute.

| Game                                 | Solved Levels % | # Total Levels | Max Search Iterations |
|--------------------------------------|-----------------|----------------|-----------------------|
| The Dragon's Cave                    | 0%              | 2              | 100000                |
| Grunt work of the revolution puzzles | 0%              | 9              | 100000                |
| Zen Puzzle Garden                    | 0%              | 1              | 100000                |
| Come Doggo come - Al-literation      | 0%              | 5              | 100000                |
| MicroChip                            | 0%              | 1              | 100000                |
| PS Paint                             | 0%              | 3              | 100000                |
| Government Final Exam                | 0%              | 1              | 100000                |
| Twin Drop                            | 0%              | 5              | 100000                |
| dungeons                             | 0%              | 1              | 100000                |
| gunslinger                           | 0%              | 2              | 100000                |
| Simple Block Pushing Game            | 0%              | 5              | 100000                |
| PENTAGO                              | 0%              | 1              | 100000                |
| actiontest                           | 0%              | 1              | 100000                |
| i herd u liek water templs           | 0%              | 1              | 100000                |
| Lawn-Mowing Robot                    | 0%              | 7              | 100000                |
| Drainage                             | 0%              | 9              | 100000                |
| Laserverse                           | 0%              | 1              | 100000                |
| zenpuzzlegarden                      | 0%              | 11             | 100000                |
| Pipes                                | 0%              | 5              | 100000                |
| notsnake                             | 0%              | 3              | 100000                |
| window hero                          | 0%              | 1              | 100000                |
| Light Maze                           | 0%              | 9              | 100000                |
| dot puzzle test                      | 0%              | 3              | 100000                |
| MATCH 3 PUZZLE                       | 0%              | 1              | 100000                |
| Net                                  | 0%              | 1              | 100000                |
| legend of zokoban                    | 0%              | 1              | 100000                |
| Meatball                             | 0%              | 1              | 100000                |
| Puzzle Stitch                        | 0%              | 2              | 100000                |
| rigid parallel many                  | 0%              | 1              | 100000                |
| W3RDS                                | 0%              | 1              | 100000                |
| Dash Boulder                         | 0%              | 1              | 100000                |
| FS Game Dev Workshop                 | 0%              | 5              | 100000                |
| Luxbend II Marbles                   | 0%              | 1              | 100000                |
| Hack It! - Tilt Game                 | 0%              | 1              | 100000                |
| ColorLift                            | 0%              | 1              | 100000                |
| Rush Hour                            | 0%              | 1              | 100000                |
| The Lucid Dreamer                    | 0%              | 1              | 100000                |
| Give me ur key                       | 0%              | 4              | 100000                |
| bouncers                             | 0%              | 1              | 100000                |
| Bouncers                             | 0%              | 5              | 100000                |
| Bubble Boy                           | 0%              | 5              | 100000                |
| Puzzle Defender                      | 0%              | 3              | 100000                |
| Colorblend                           | 0%              | 1              | 100000                |
| chaos wizard ii spell-crafter        | 0%              | 1              | 100000                |
| MatchLess 0.2                        | 0%              | 4              | 100000                |
| Weird Bug II Weird Bugger            | 0%              | 1              | 100000                |

Continued on next page

Table 5: Results of BFS on full dataset of games, with max 100,000 max search iterations and a timeout of 1 minute.

| Game                                     | Solved Levels % | # Total Levels | Max Search Iterations |
|------------------------------------------|-----------------|----------------|-----------------------|
| Count Mover                              | 0%              | 1              | 100000                |
| Ice Block Game                           | 0%              | 1              | 100000                |
| rigid one unlimited                      | 0%              | 1              | 100000                |
| A Unexamined Life Is Not Worth Meowing   | 0%              | 1              | 100000                |
| Un-Lock                                  | 0%              | 1              | 100000                |
| All These Damn Crates                    | 0%              | 4              | 100000                |
| PuzzleTech 0.73                          | 0%              | 1              | 100000                |
| Minsweeper Demake                        | 0%              | 1              | 100000                |
| Flash Point Fire Rescue                  | 0%              | 1              | 100000                |
| Two level puzzle                         | 0%              | 3              | 100000                |
| Attack of the Martian Giants             | 0%              | 7              | 100000                |
| Snake                                    | 0%              | 1              | 100000                |
| SNAQUIA                                  | 0%              | 1              | 100000                |
| Colour Chained Endless                   | 0%              | 1              | 100000                |
| Pixel Master                             | 0%              | 8              | 100000                |
| Flower Dance                             | 0%              | 1              | 100000                |
| The Block Tower                          | 0%              | 1              | 100000                |
| Password                                 | 0%              | 3              | 100000                |
| AutoTrom                                 | 0%              | 1              | 100000                |
| The Riddle Machine                       | 0%              | 5              | 100000                |
| Paint2                                   | 0%              | 1              | 100000                |
| Puzzle-Design Home-work                  | 0%              | 5              | 100000                |
| Snakeskin                                | 0%              | 8              | 100000                |
| AutoDom                                  | 0%              | 1              | 100000                |
| twolittlecrates4                         | 0%              | 1              | 100000                |
| Ancient Puzzles of Colossal Caves indev4 | 0%              | 8              | 100000                |
| Bloxyd                                   | 0%              | 24             | 100000                |
| twolittlecrates3                         | 0%              | 1              | 100000                |
| Futuristic Block Pushing Game            | 0%              | 1              | 100000                |
| ledchallenge                             | 0%              | 4              | 100000                |
| N Step Punt                              | 0%              | 2              | 100000                |
| Thirty-Two Nanobots                      | 0%              | 1              | 100000                |
| Tunnel Rat                               | 0%              | 2              | 100000                |
| Fireproof bomber                         | 0%              | 5              | 100000                |
| Polyomino Puzzles                        | 0%              | 3              | 100000                |
| Good Example                             | 0%              | 1              | 100000                |
| blocks                                   | 0%              | 1              | 100000                |
| Kiri's Garden                            | 0%              | 7              | 100000                |
| Dull Pacman Clone                        | 0%              | 1              | 100000                |
| Spider Solitaire                         | 0%              | 1              | 100000                |
| Battle-Mage                              | 0%              | 1              | 100000                |
| random test                              | 0%              | 6              | 100000                |
| dropswap                                 | 0%              | 5              | 100000                |
| No Fault of My Own                       | 0%              | 3              | 100000                |
| Luxbend                                  | 0%              | 1              | 100000                |
| rigid many many                          | 0%              | 2              | 100000                |
| Jormungandr                              | 0%              | 1              | 100000                |

Continued on next page



Table 5: Results of BFS on full dataset of games, with max 100,000 max search iterations and a timeout of 1 minute.

| Game                     | Solved Levels % | # Total Levels | Max Search Iterations |
|--------------------------|-----------------|----------------|-----------------------|
| twolittlecrates1         | 0%              | 1              | 100000                |
| 2048                     | 0%              | 1              | 100000                |
| watch your step          | 0%              | 1              | 100000                |
| Harvesting Apples        | 0%              | 1              | 100000                |
| Cell Division            | 0%              | 1              | 100000                |
| rigid parallel unlimited | 0%              | 1              | 100000                |
| I Have No Mouth, And I   | 0%              | 1              | 100000                |
| Cannot Push Two Boxes    | 0%              | 1              | 100000                |
| Forest Road              | 0%              | 10             | 100000                |
| randomspawner            | 0%              | 1              | 100000                |
| Sok7                     | 0%              | 1              | 100000                |
| sok7                     | 0%              | 1              | 100000                |
| Ice Breaker              | 0%              | 1              | 100000                |
| Big Dave                 | 0%              | 1              | 100000                |
| 1D M3                    | 0%              | 1              | 100000                |
| Handle with Care         | 0%              | 3              | 100000                |
| Merger Tiles - 2048      | 0%              | 1              | 100000                |
| Remix                    | 0%              | 1              | 100000                |
| twolittlecrates2         | 0%              | 1              | 100000                |
| Go                       | 0%              | 5              | 100000                |
| Bunshin master 0.75      | 0%              | 1              | 100000                |

## 1128 Additional references

- 1129 [35] Philip Bontrager, Wending Lin, Julian Togelius, and Sebastian Risi. Deep interactive evo-  
1130 lution. In *Computational Intelligence in Music, Sound, Art and Design: 7th International*  
1131 *Conference, EvoMUSART 2018, Parma, Italy, April 4-6, 2018, Proceedings*, pages 267–282.  
1132 Springer, 2018.
- 1133 [36] Sam Earle, Samyak Parajuli, and Andrzej Banburski-Fahey. Dreamgarden: A designer assis-  
1134 tant for growing games from a single prompt. In *Proceedings of the 2025 CHI Conference on*  
1135 *Human Factors in Computing Systems*, pages 1–19, 2025.
- 1136 [37] Timothy Merino, Megan Charity, and Julian Togelius. Interactive latent variable evolution for  
1137 the generation of minecraft structures. In *Proceedings of the 18th International Conference on*  
1138 *the Foundations of Digital Games*, pages 1–8, 2023.
- 1139 [38] Jimmy Secretan, Nicholas Beato, David B D Ambrosio, Adelein Rodriguez, Adam Campbell,  
1140 and Kenneth O Stanley. Picbreeder: evolving pictures collaboratively online. In *Proceedings*  
1141 *of the SIGCHI conference on human factors in computing systems*, pages 1759–1768, 2008.
- 1142 [39] Graham Todd, Alexander Padula, Matthew Stephenson, Éric Piette, Dennis JNJ Soemers, and  
1143 Julian Togelius. Gavel: Generating games via evolution and language models. *arXiv preprint*  
1144 *arXiv:2407.09388*, 2024.
